# 1 SARS-CoV-2 infection dynamics and genomic surveillance reveals early 2 variant transmission in urban wastewater

3  
4 Sanjay Lamba, Sutharsan G, Namrta Daroch, Kiran Paul, Soumya Gopal Joshi, Darshan S,  
5 Annamalai N, Vishwanath S, Rakesh Mishra, Uma Ramakrishnan and Farah Ishtiaq\*

6  
7 Tata Institute for Genetics and Society, GKVK Post, Bellary Road, Bangalore-560065, India

8 National Centre for Biological Sciences, TIFR, Bellary Road, Bangalore-560065, India

9 Biome Environmental Trust, Bangalore-560097, India

10 \*Corresponding author: [farah.ishtiaq@tigs.res.in](mailto:farah.ishtiaq@tigs.res.in)

## 11 12 **Abstract**

13 Environmental surveillance (ES) of a pathogen is crucial for understanding the community load  
14 of disease. As an early warning system, ES for SARS-CoV-2 has complemented routine  
15 diagnostic surveillance by capturing near real-time virus circulation at a population level. In  
16 this longitudinal study in 28 sewershed sites in Bangalore city, we quantified SARS-CoV-2  
17 RNA to track infection dynamics and provide evidence of change in the relative abundance of  
18 emerging variants. We describe an early warning system using the exponentially weighted  
19 moving average control chart and demonstrate how SARS-CoV-2 RNA concentrations in  
20 wastewater correlated with clinically diagnosed new COVID-19 cases, with the trends  
21 appearing 8–14 days earlier in wastewater than in clinical data. This was further corroborated  
22 by showing that the estimated number of infections is strongly correlated with SARS-CoV-2  
23 RNA copies detected in the wastewater. Using a deconvolution matrix, we detected emerging  
24 variants of concern up to two months earlier in wastewater samples. In addition, we found a  
25 huge diversity in variants detected in wastewater compared to clinical samples. Our study  
26 highlights that quantifying viral titres, correlating it with a known number of cases in the area,  
27 and combined with genomic surveillance helps in tracking VOCs over time and space, enabling  
28 timely and making informed policy decisions.

29  
**NOTE: This preprint reports new research that has not been certified by peer review and should not be used to guide clinical practice.**

## 30 **Introduction**

31  
32 Globally, the COVID-19 pandemic (infectious pneumonia caused by Severe Acute Respiratory  
33 Syndrome Coronavirus 2: SARS-CoV-2) has brought Wastewater-based (sewage)  
34 epidemiology (WBE) to the forefront of the health surveillance system. Wastewater testing can  
35 provide a parallel and complementary snapshot of community health. WBE has become an  
36 integral component of environmental surveillance in more than 60 countries covering over  
37 3000 sites<sup>1,2</sup> providing near-real time information on health and community exposure to  
38 COVID-19<sup>3</sup>. Analysis of sewage identified evidence of SARS-CoV-2 RNA circulating 56 days  
39 in advance of the first clinically confirmed case in South America and 91 days in advance of  
40 the first clinically confirmed case in Brazil<sup>4</sup>, highlighting the crucial role of WBE in disease  
41 surveillance. Mostly, detection of SARS-CoV-2 in wastewater was correlated with local  
42 COVID-19 incidence, preceding the increase in clinical cases, locally by 1 to 3 weeks.  
43 Furthermore, WBE has also been used to detect regionally prevalent variants of SARS-CoV-  
44 2<sup>5</sup>. Given its potential to be a relatively widespread, economical, and rapid surveillance tool,  
45 WBE provides an excellent opportunity for a developing country like India, where issues such  
46 as unprecedented population growth (especially in urban centres), migrating populations, lack  
47 of public health systems and lack of integrated health surveillance are a reality.

48  
49 WBE was first identified as an effective population wide monitoring technique over 40 years  
50 ago– with a high capacity for retrospective indication of poliovirus, norovirus, influenza,  
51 hepatitis and measles outbreaks<sup>6</sup>. Nonetheless, it has rarely been integrated into the health  
52 surveillance system in India except for environmental surveillance of poliovirus (Global polio  
53 eradication initiative. e.g.,<sup>7</sup>). Environmental surveillance played a crucial role in poliovirus  
54 eradication in India in 2012 and continues to provide vital support in documenting the absence  
55 of the polio virus in conjunction with active surveillance of acute flaccid paralysis (AFP)  
56 cases<sup>7-9</sup>.

57  
58 In India, tracking of the COVID-19 pandemic relies heavily on testing symptomatic individuals  
59 for the presence of SARS-CoV-2 RNA and counting the positive tests over time. With high  
60 population density, many SARS-CoV-2 infected persons are likely to be asymptomatic or  
61 oligosymptomatic. They are generally not clinically tested, leading to underestimation of  
62 COVID-19 trends and prevalence. There is a need for new strategies to track the emergence  
63 and spread of SARS-CoV-2 variants. Currently, epidemiological surveillance relies on testing  
64 symptomatic cases using the respiratory tract as the principal site for virus replication.

65 However, the virus also replicates in the gastrointestinal tract leading to a high viral load in  
66 excreta<sup>10</sup>. The qPCR-based approach has revealed a strong correlation between SARS-CoV-2  
67 incidence rates and the viral load in wastewater<sup>11-13</sup>. With the continued emergence of new  
68 variants, we also need new approaches to identify the diversity between variants that might  
69 have escaped individual testing. Alternatively, emerging variants in wastewater suggests that  
70 a significant proportion of individuals in the community are infected with it and thus, shedding  
71 the virus.

72

73 WBE is a powerful approach where epidemiological data must combine with genomic  
74 surveillance to gain insights into how the virus populations are changing, and how the virus is  
75 evolving. How long does it take for new variants to emerge and spread across cities (major  
76 hubs with international airports) and to rural or suburban areas? Wastewater samples are a  
77 mixed representative of local lineages circulating in the community. Monitoring SARS-CoV-  
78 2 lineages using wastewater has remained challenging due to low-quality reads, fragmented  
79 sequences, and the inability to estimate the relative lineage abundance based on patchy variant-  
80 defining mutations in a mixed community sample. Furthermore, SARS-CoV-2 lineages  
81 classification using pangolin<sup>14</sup> and USHER<sup>15</sup>, designed for clinical samples often contain a  
82 single dominant variant and tend to underestimate the relative abundances of multiple SARS-  
83 CoV-2 lineages in samples with mixtures of viral genomes such as wastewater.

84

85 Using longitudinal testing of wastewater and quantitative epidemiological modelling, we  
86 aimed to investigate the relationship between wastewater SARS-CoV-2 concentrations, and  
87 COVID-19 cases. In addition, we used high throughput sequencing techniques, to quantify the  
88 prevalence and genetic diversity including the newly emerging SARS-CoV-2 variants in  
89 Bangalore city (12.9716° N, 77.5946° E, Karnataka, India). Wastewater samples from the inlet  
90 of 28 sewage treatment plants covering over 11 million people are being monitored for SARS-  
91 CoV-2 between August 2021-June 2022. We used next-generation sequencing of SARS-CoV-  
92 2 RNA and modelling of viral concentration from wastewater to explore the dynamics in  
93 diversity and abundance of SARS-CoV-2 lineages in Bangalore city. Our longitudinal study  
94 was initiated post second wave (Delta wave) from August 2021 through to the third wave  
95 (Omicron wave). Here we present results from January till June 2022 to show diversity in  
96 lineages of SARS-CoV-2 in wastewater and their comparison with the clinical data. This allows  
97 us to test the relationship between an increase in viral concentrations in wastewater with  
98 observed variant diversity across spatiotemporal scales. We hypothesize that high variant

99 diversity is expected during a low viral load/low infection rate period. However, there should  
100 be a transition in the lineage of the dominant variant at the peak of infection period during high  
101 infection rates. In addition, we explore the emergence of new variants that would have escaped  
102 identification in clinical surveillance. Furthermore, we evaluate the lag between emerging new  
103 lineages in symptomatic individuals and wastewater samples representing community data.

104

## 105 **Results**

### 106 *Longitudinal wastewater sampling can predict SARS-CoV-2 rise 1-2 weeks in advance*

107

108 The normalised temporal trend of SARS-CoV-2 RNA in wastewater and new positive cases in  
109 Bangalore city are shown in Fig.2. Pearson's correlation for citywide viral load showed a  
110 marginally stronger correlation with citywide COVID-19 cases with a time lag of 7-days than  
111 4-days ( $R^2=0.87$ ,  $p=0.00001$ ; Fig. 3 A & B). The sensitivity analysis showed that the estimated  
112 number of infections strongly correlates with the log SARS-CoV-2 RNA copies detected in the  
113 wastewater (Fig. 3. C & D).

114

115 We used EWMA of RNA concentration in wastewater (smoothing parameter=0.7,  $\rho = 2$ ) and  
116 new clinical cases (smoothing parameter=0.7,  $\rho = 2$ ) to show the qualitative trend in the city.  
117 Evidently, there were two major outbreaks- January and June 2022. The EWMA captured the  
118 increased viral load and associated estimated infection during the peak of the SARS-CoV-2  
119 wave in January 2022. The EWMA showed an increased viral trend in June as 'red alert' and  
120 associated estimated number of infections at least 14 days and 8 days in advance using time-  
121 lags of 7 days and 4-days, respectively (Table 1). SARS-CoV-2 was detected throughout the  
122 period with a low viral load of 6.38 copies/person/day (log scale) from 27<sup>th</sup> March to 8<sup>th</sup> April  
123 2022. While the viral load pattern mirrored with the clinical data, COVID-19 positive cases  
124 appeared to remain underreported in the city. The estimated number of infected cases remained  
125 high indicating viral detection in wastewater in the early stage (below LCL) of the local  
126 outbreak (Fig. 2). Our EWMA analysis showed that using a time lag of 7 days, the increased  
127 estimated infected individuals trend reached the red alert (UCL ~ 23106 cases/week) whereas  
128 COVID-19 cases were near the mean (threshold value ~2847 cases/week). Using a time lag of  
129 4 days, the estimated infected individuals reached the red alert (UCL ~ 14803 cases / 4 days)  
130 whereas COVID-19 cases were near the mean and were rising to reach the red alert (UCL  
131 ~2310 cases / 4 days).

132  
133  
134  
135  
136

The viral trend showed an increase from 15<sup>th</sup> April 2022 which remained below the early warning stage, with a consistent 30-70% rise in the following weeks reaching the ‘early warning’ stage by 17<sup>th</sup> June 2022 (Table 1).

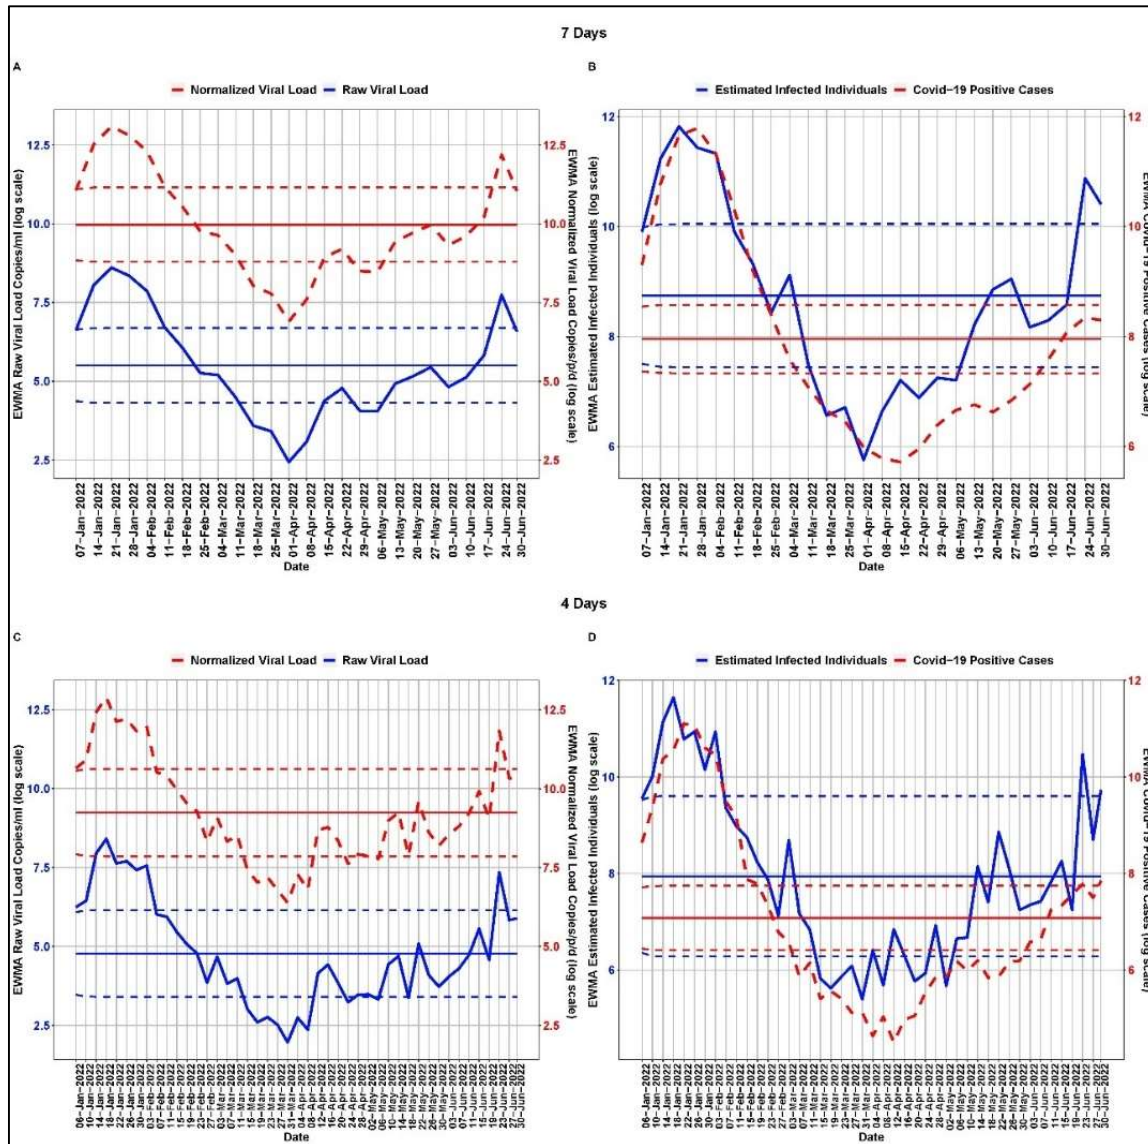

137  
138  
139  
140  
141  
142

Figure 2. Temporal dynamics of normalized viral load in wastewater and COVID-19 cases in Bangalore. The dark centre red line shows the mean viral load, the dotted line above the mean is the upper control limit and the dotted line below the mean is the lower control limit. The 3<sup>rd</sup> wave started in late December 2021 with peak in January and dropped down in February 2022.

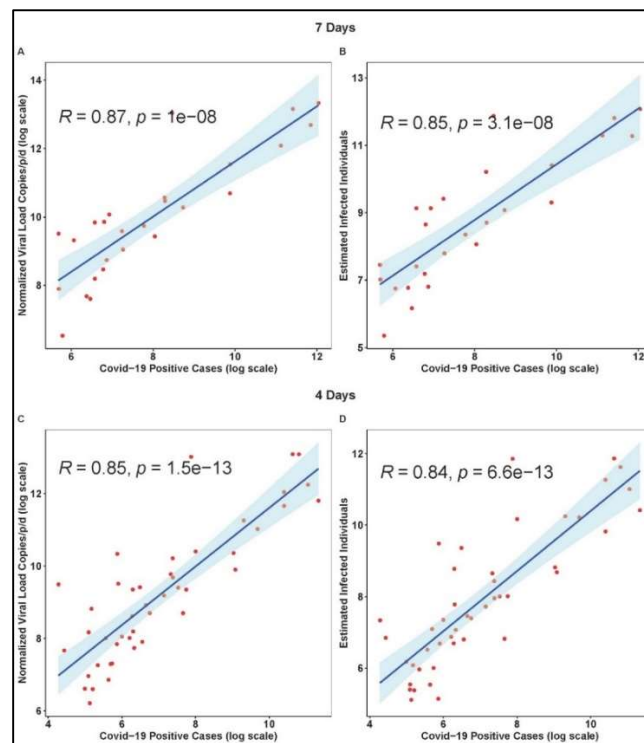

143

144 Figure 3. Viral concentrations correlate with daily new cases with a 4-d and 7-d time lag in Bangalore city. The  
145 Blue solid line is the linear regression fitting. Light blue area: 95% confidence interval from standard error of  
146 the fitting.

147

148 We detected comparable levels and variable SARS-CoV-2 infection dynamics for STPs (Fig.  
149 4). All STPs showed viral signals throughout the study period. However, 10 STPs consistently  
150 showed high positivity (Table 1). The EWMA varied for each STP driven by the capacity,  
151 inflow rate and catchment area. Four sewershed sites- Agaram, KR Puram, KC Valley1 and  
152 KC Valley2 showed 'red alert' with the EWMA viral load greater than the projected line (upper  
153 control limit). Seventeen sewershed sites; Chikkabegur, Chikkabanvara, Cubbon Park,  
154 Doddabelee, Hebbal, Horamavu Agara, Kengeri, Mallathahalli, Rajacanal, V. Valley, Sarakki,  
155 Hulimavi, Yele Mallappa Chetti Kere, Nagasandra, Nagasandra-Ph-1, Kadabeesanahalli Ph-1,  
156 and Bellandur Amani Kere showed early warning signal with viral load projected above the  
157 mean line (Fig. 4). The EWMA mirrored estimated infected individuals for the catchment area  
158 of each STP and mainly reflected with an increase in estimated infected individuals with an  
159 increasing viral trend.

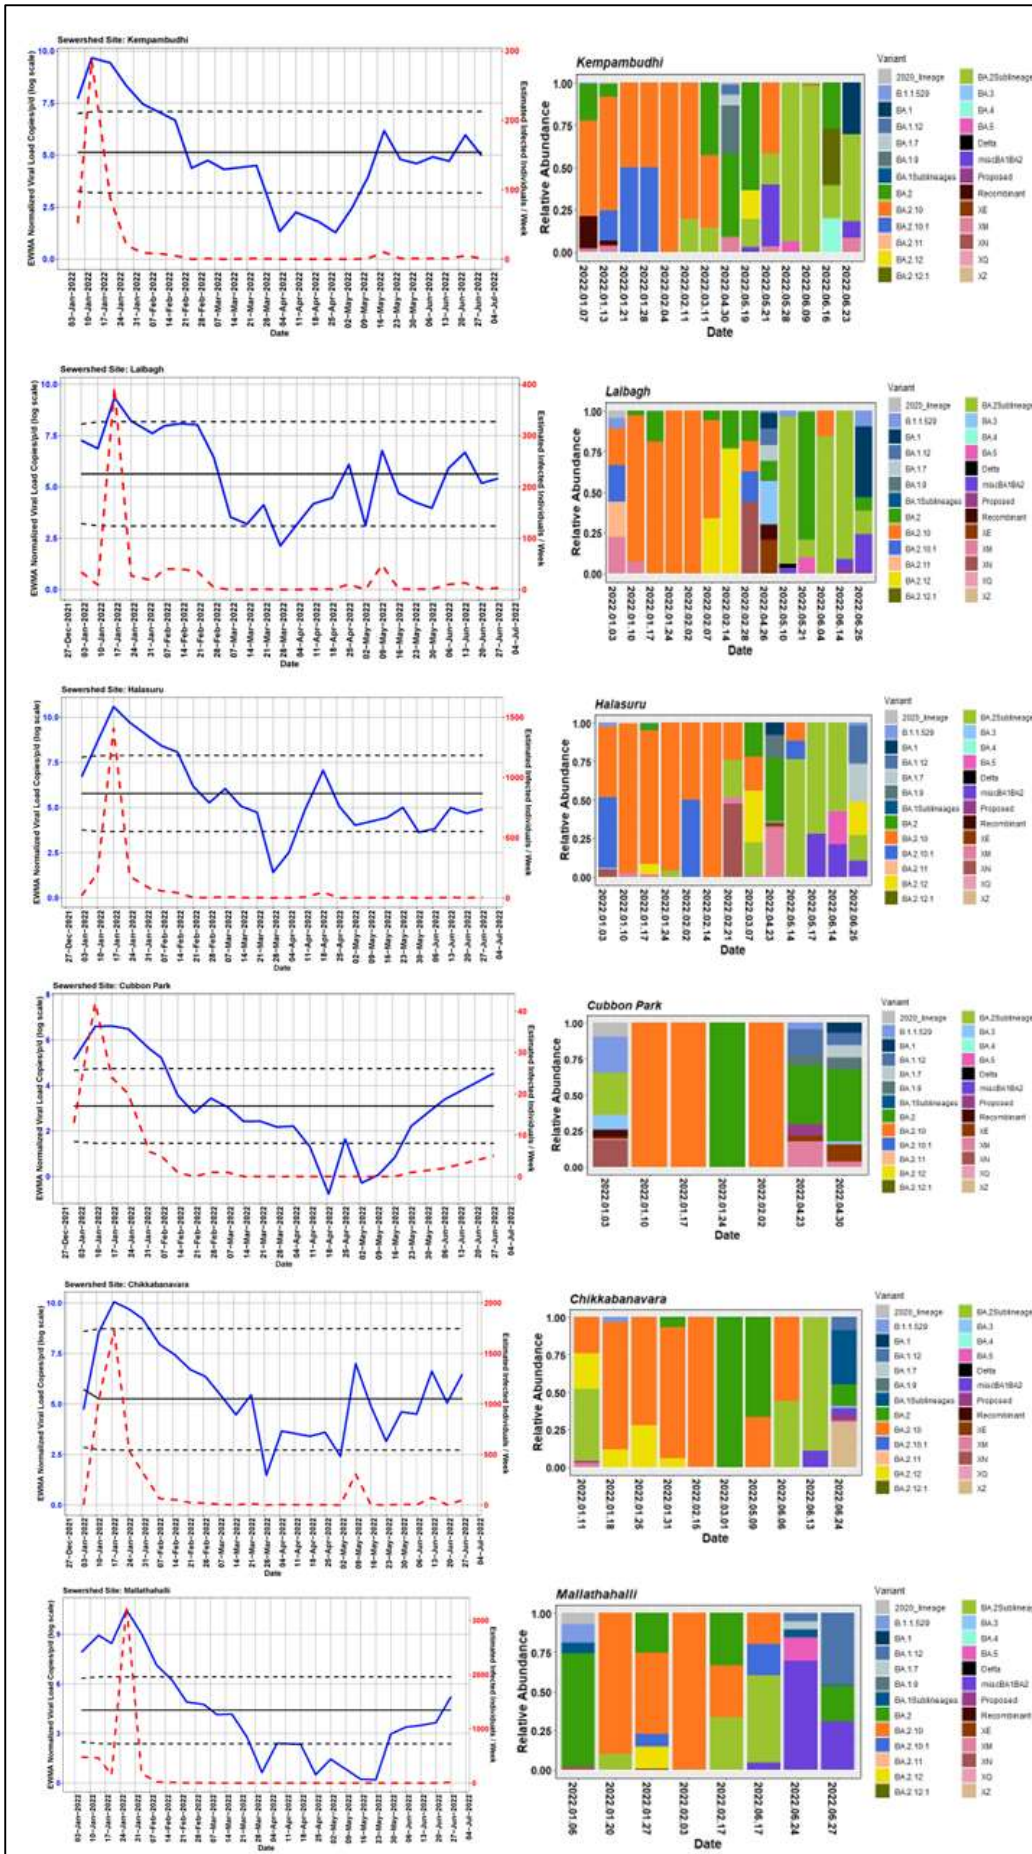

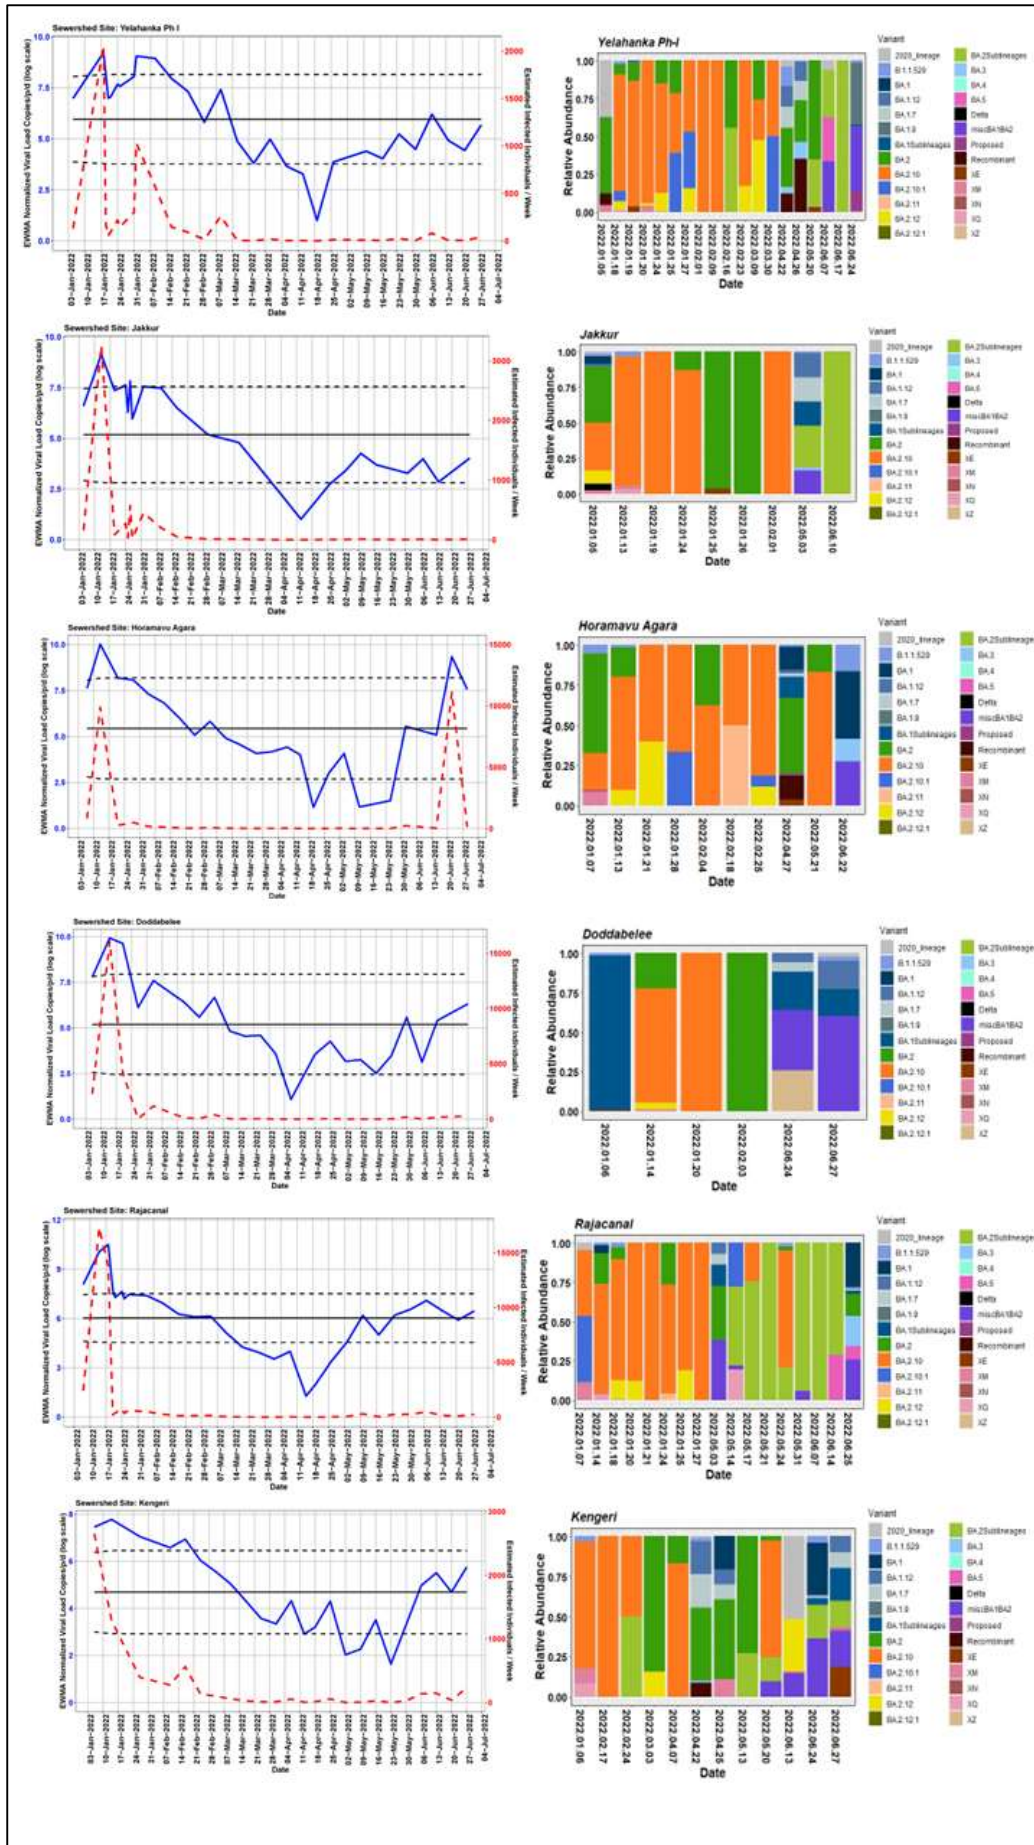



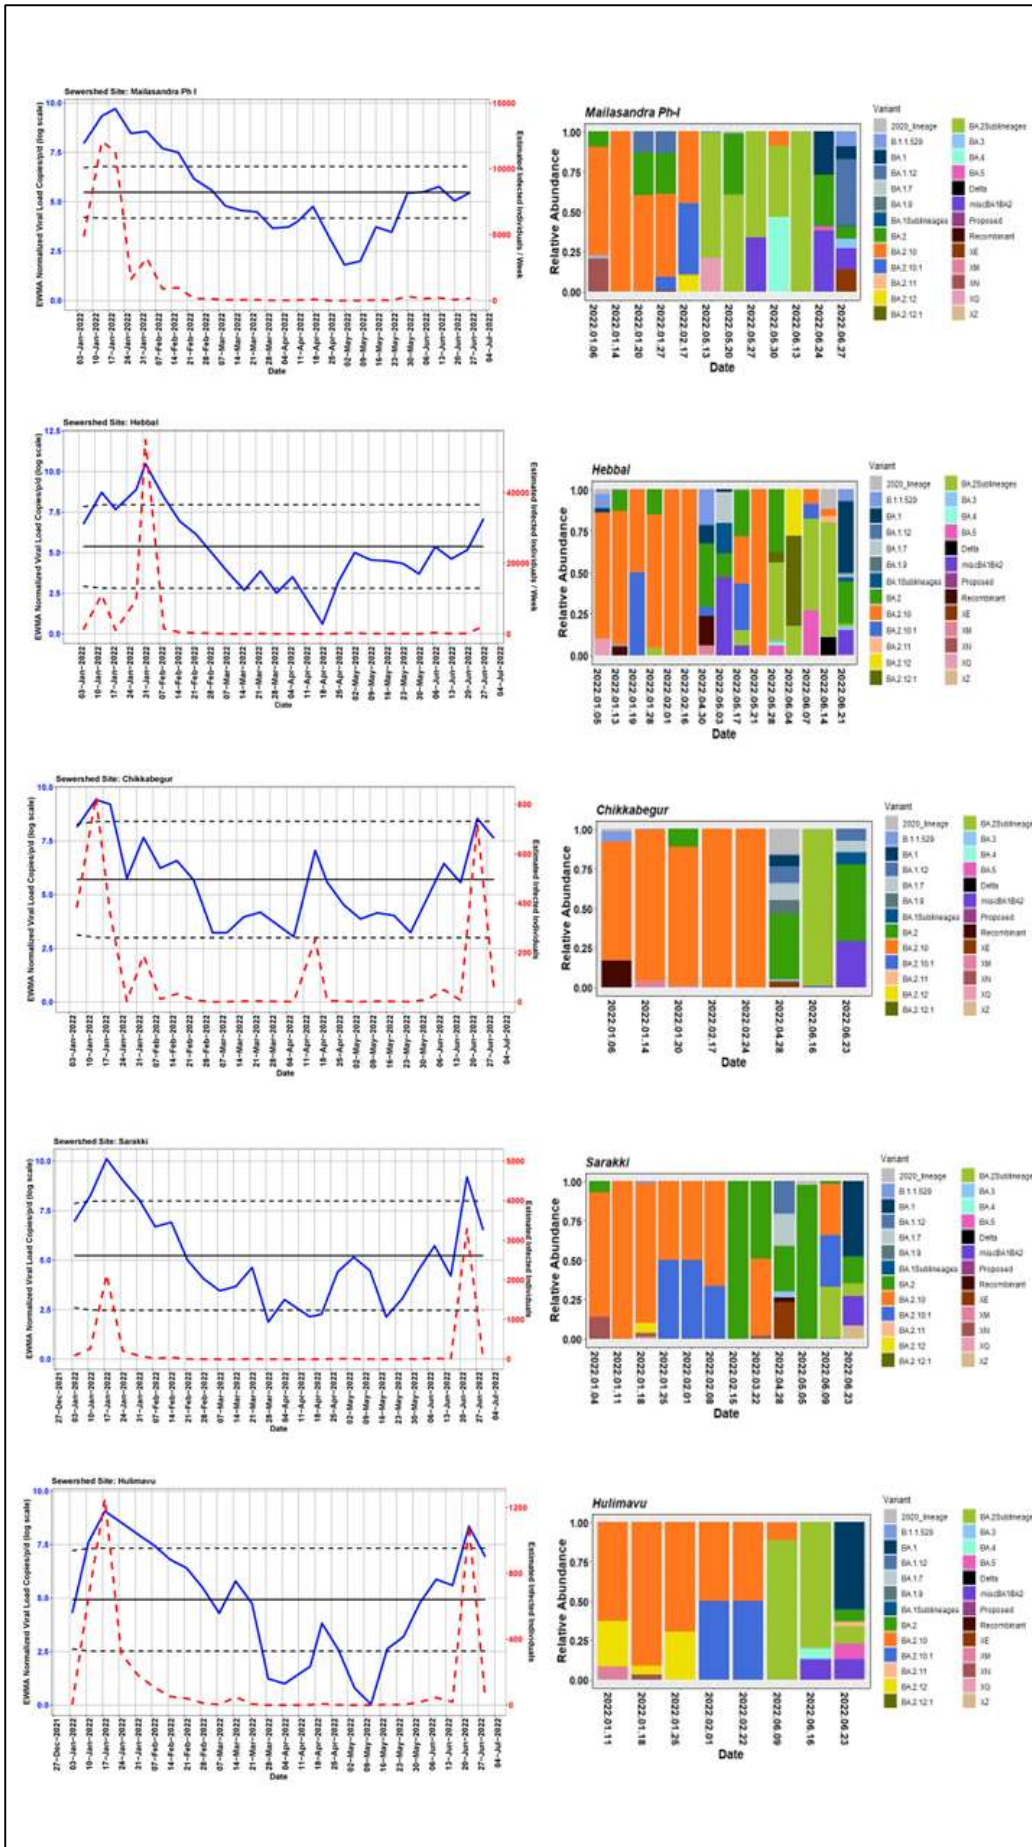

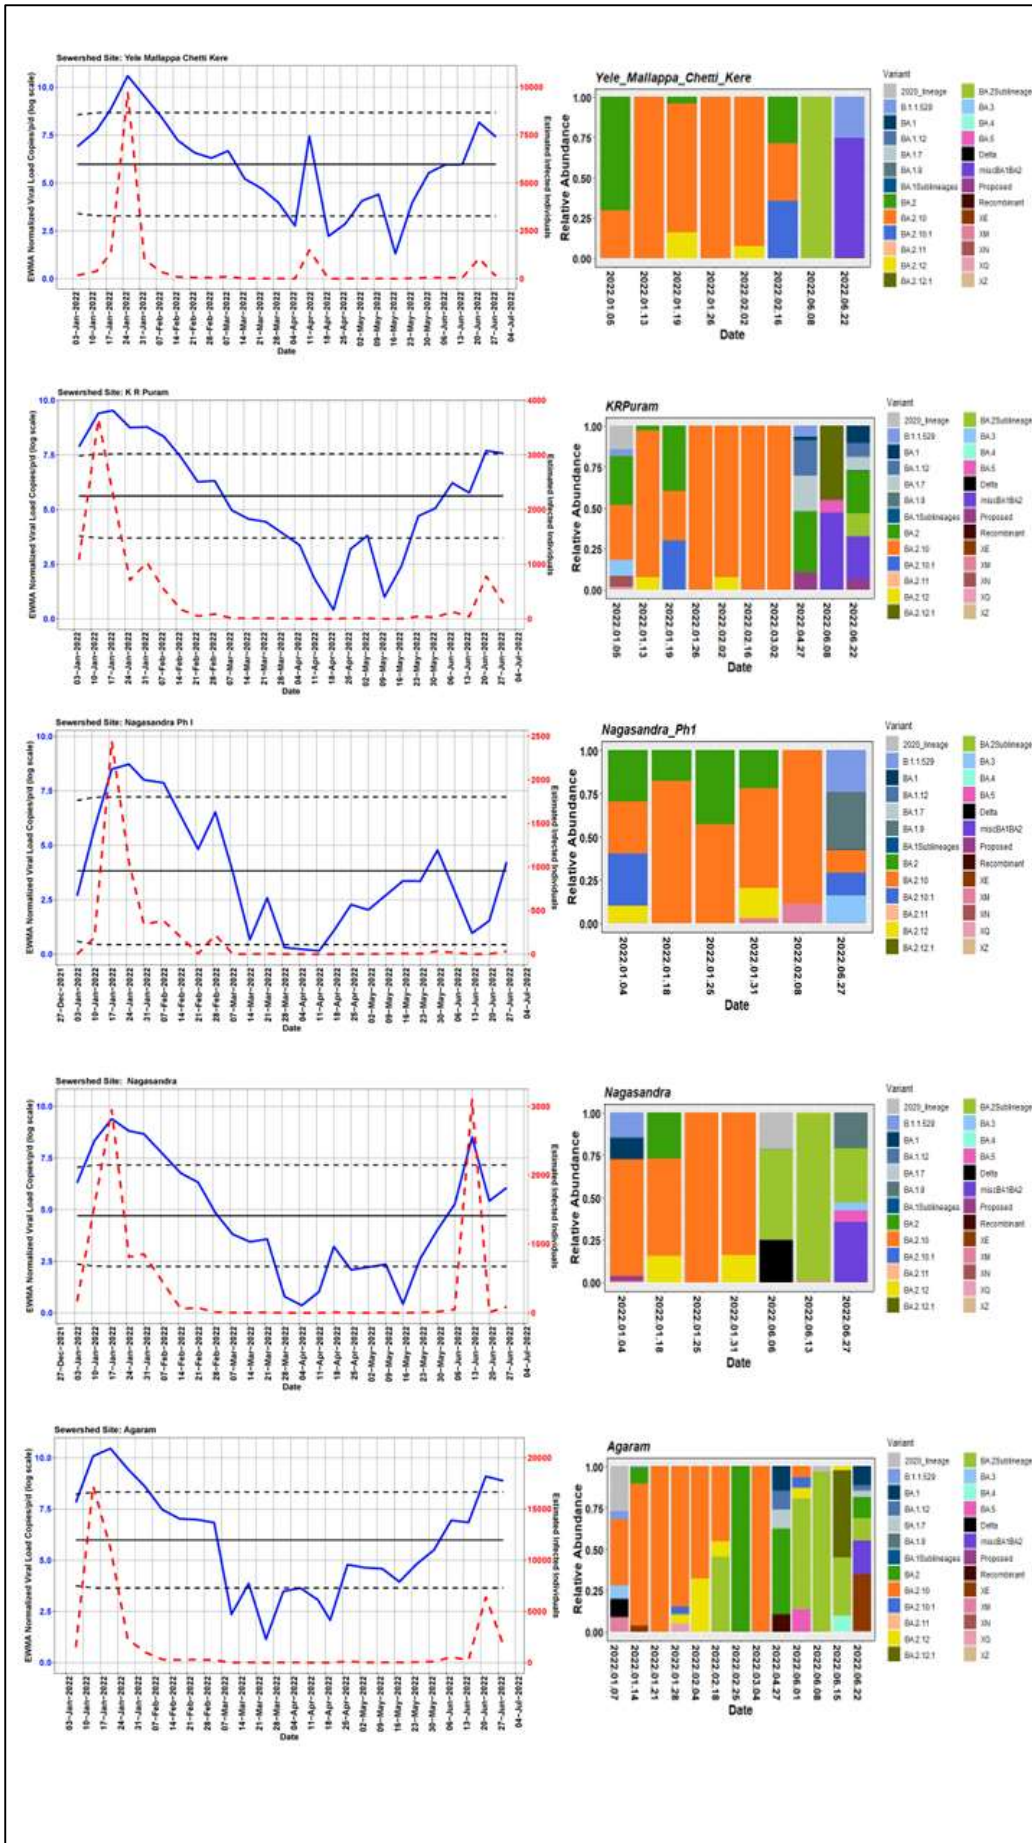

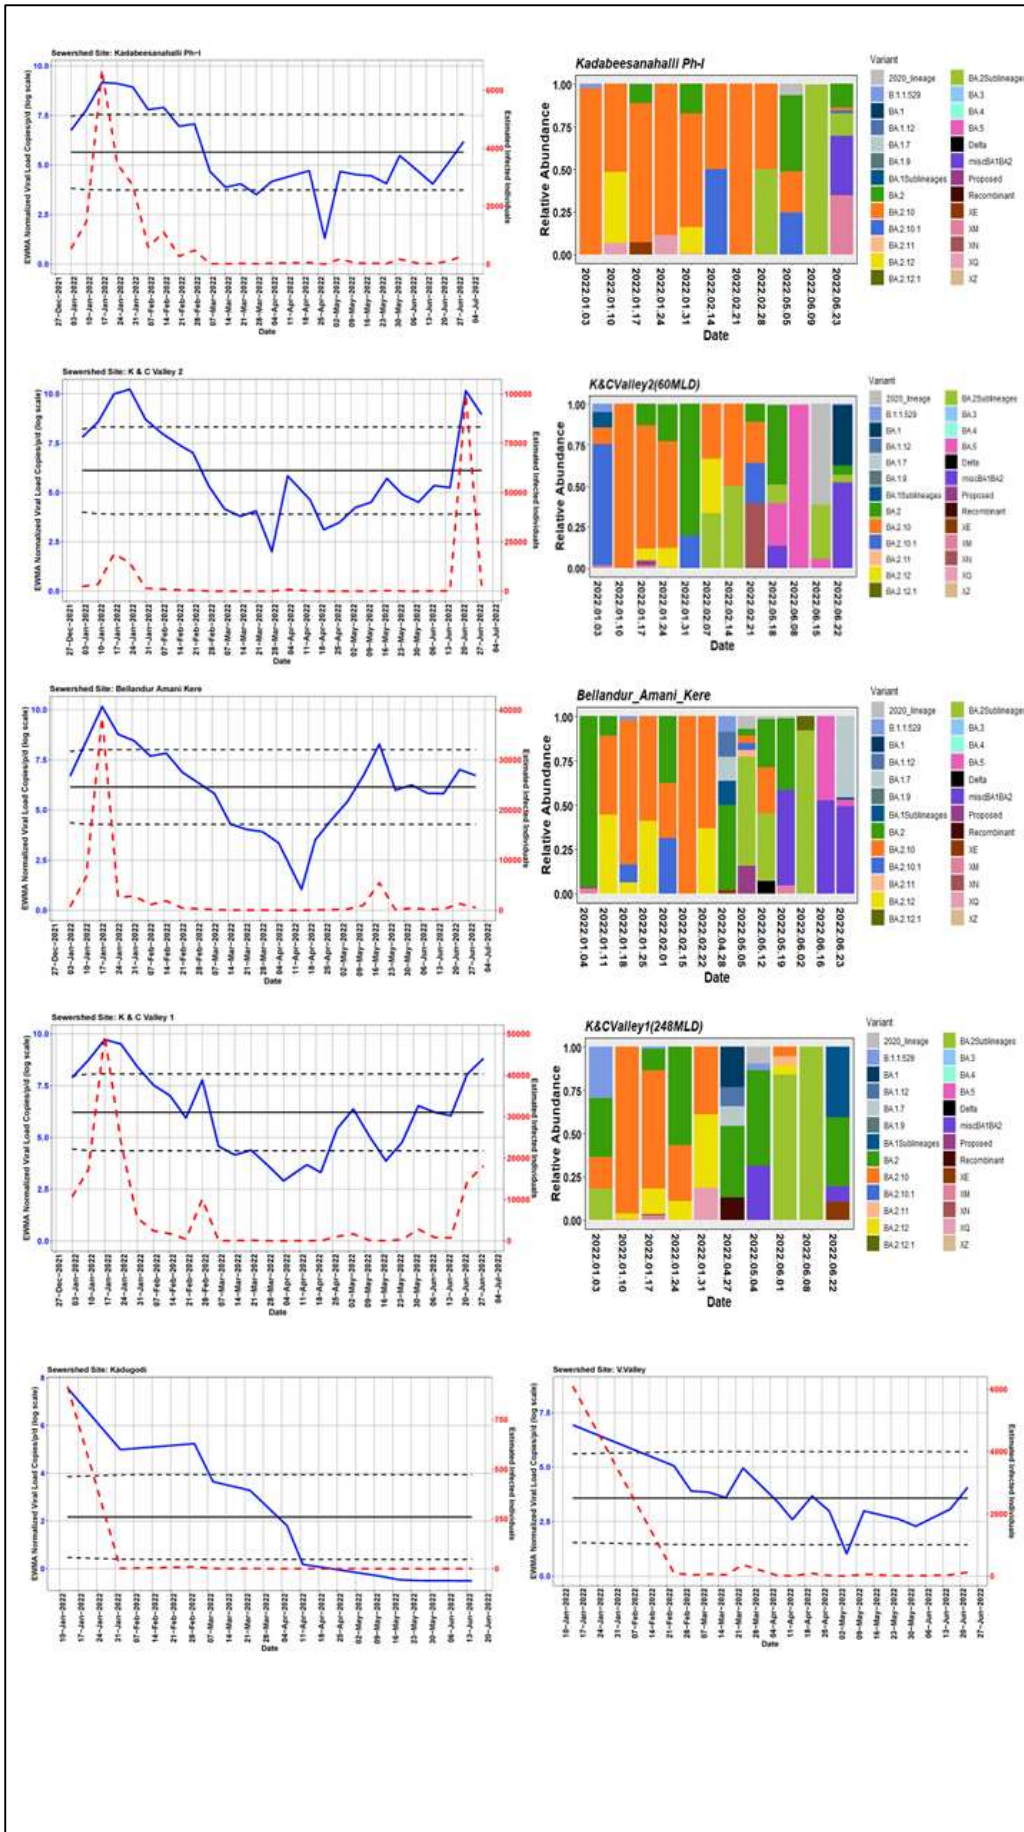

165 Fig. 4. The exponentially weighted moving average charts for each sewershed site and the relative abundance of  
166 variants by date of collection.

167

### 168 *SARS-CoV-2 abundance and diversity in wastewater*

169

170 We analysed 878 wastewater samples from 1 January 2022-30 June 2022. To compare  
171 wastewater genomic surveillance with clinical surveillance, we sequenced 422 positive  
172 wastewater samples. The genome coverage ranged between 1%–99%. The CT values showed  
173 a negative correlation with viral load copies ( $-51.34$ ,  $p<0.0001$ ) and genome coverage ( $-1.77$ ,  
174  $p<0.0001$ ) (Fig. S1). Therefore, we considered samples ( $n=304$ ) above 70% genome coverage  
175 for subsequent analyses. The low viral copies between 28<sup>th</sup> March to 8<sup>th</sup> April 2022 are reflected  
176 in our sequencing success; hence, there is a gap in sequencing data despite continuous  
177 sampling. The read abundance was not significantly different across month (Fig. S2).

178

179

180 Using *Freyja* we analysed relative abundance and diversity in SARS-CoV-2 lineages. Our  
181 validation results for clinical samples showed the expected lineages. In addition, a mixture of  
182 variants that were not identified using traditional pipeline (see Fig. S3). These clinical samples  
183 were reported infected with only one variant, however, we found mutations associated with  
184 other variant suggesting mixed infections. Our follow-up analysis using *Freyja* showed a total  
185 abundance of 1220 lineages representing 152 distinct lineages in wastewater from January-  
186 June 2022 (Fig. 5). Of these seven lineages from Omicron family were in dominant. We found  
187 BA.2.10 was the most dominant lineage (14.83%), followed by BA.2 (10.49%), B.1.1529  
188 (5.1%), BA.2.12 (5%) and BA.2.10.1 (3.1%). We found signature mutations of two  
189 recombinant lineages of BA.1.1 and BA.2 - XM (3.9%) and XQ and XE (1%).

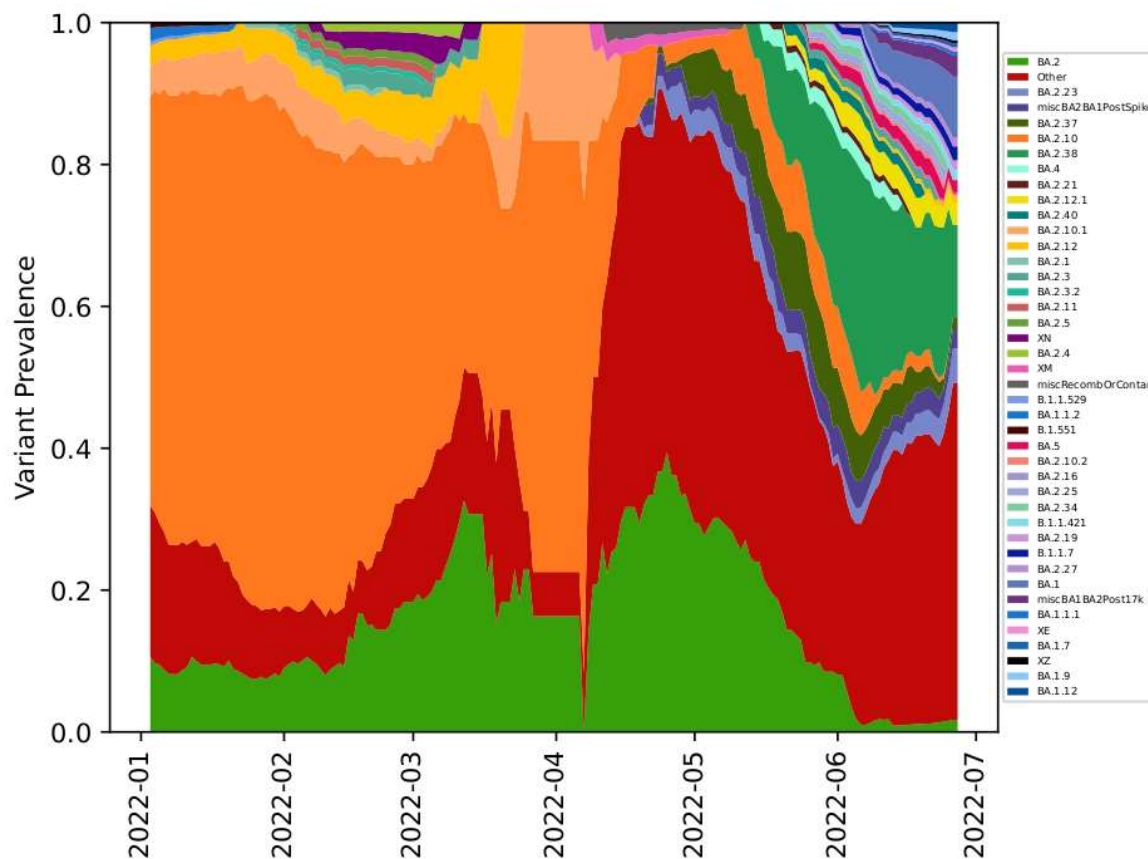

190  
 191 Fig. 5. Relative abundance of SARS-CoV-2 lineages in wastewater by date of collection in Bangalore.

192  
 193 We analyzed the Shannon indices to understand overall alpha diversity in SARS-CoV-2 which  
 194 was significantly different between months ( $F_{[5, 253]} = 19.6, P < 0.001$ ) and then used Tukey's  
 195 honestly significant difference (HSD) *post hoc* pairwise comparison testing to show that only  
 196 January-April, February-April, June-April, March-April, June-February, May-February, June-  
 197 January and May-January alpha diversities were different from each other (adjusted  $P$  value  
 198 [ $P_{adj}$ ]  $< 0.05$ ) (Fig. 6). In contrast, the alpha diversity was not significantly different between  
 199 STP ( $F_{[27, 201]} = 0.65, P = 0.90$ ). We also compared the Bray-Curtis dissimilarities of the  
 200 samples with Adonis and found that overall beta diversity values by month were significantly  
 201 different ( $R^2 = 0.27, P < 0.001$ ) but not by STP ( $R^2 = 0.09, P = 0.93$ ).

202  
 203 Finally, we used the linear-mixed effect model to show that the relative abundance of seven  
 204 dominant lineages (VOC) showed change over time - BA.2, XM (recombinant lineage of  
 205 BA.1.1 and BA.2) and XQ showed an increasing trend whereas BA.2.10, BA.2.10.1 decreased  
 206 from January to June. BA.2 lineage remained dominant in May along with 'other' lineages  
 207 found in low proportions ( $< 1\%$ ). B.1.1.529 and BA.2.12 showed no significant change in their

208 relative abundance (Fig. 7). BA.2.12 was the dominant lineage during the third wave in January  
 209 with high viral load copies/ml.

210

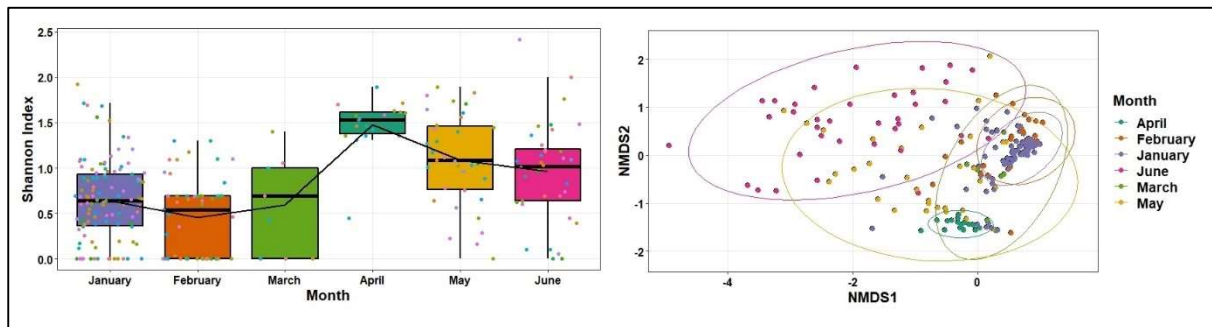

211

212 Fig. 6. Shannon diversity (alpha diversity) in lineages across months and non-metric multidimensional scaling  
 213 (NMDS) ordination of the Bray-curtis dissimilarities in lineages by month.

214

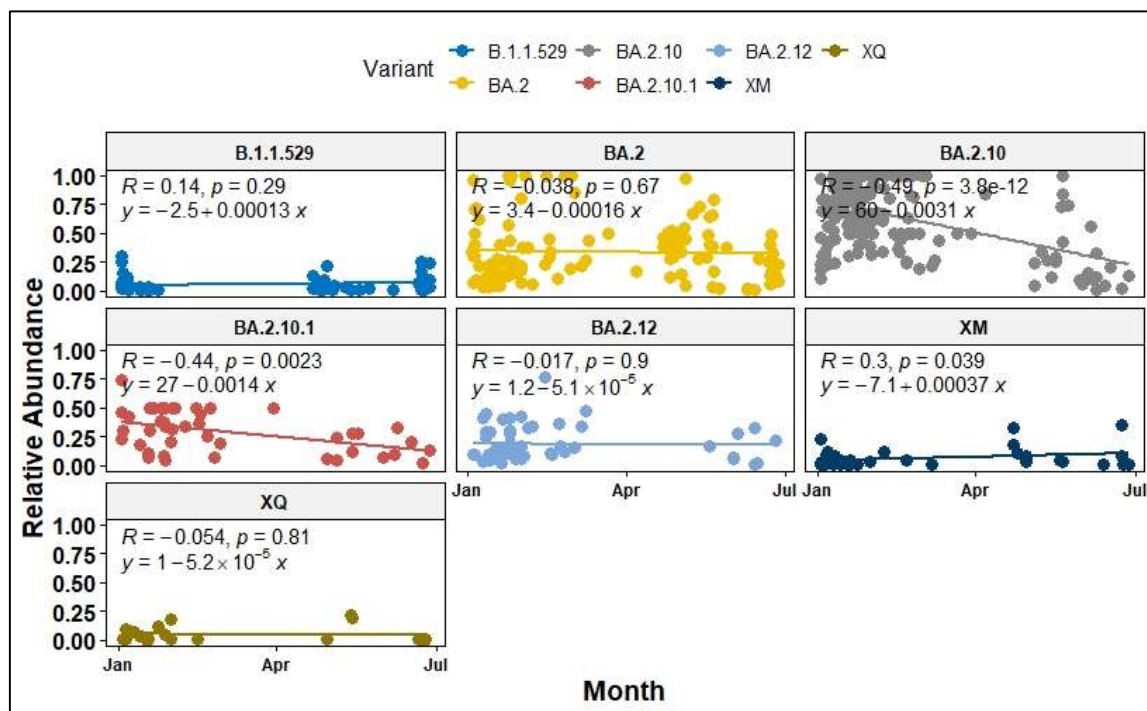

215

216 Fig.7. Relative abundance of dominant SARS-CoV-2 lineages showed a variable trend between January to June  
 217 2022.

218

219 *Comparison between Wastewater and clinical data*

220

221 We analyzed 13,478 SARS-CoV-2 genomes submitted on GISAID from January to June  
 222 (January; 7827, February; 3364, March; 364, April; 229, May; 642, June; 1052) from  
 223 Bangalore. Of these, 71 were distinct lineages that followed a similar pattern as wastewater  
 224 samples- BA.2.10 was the dominant lineage with 51.65% of the genomes, 26.90% of the

225 genomes were assigned to BA.2 and ‘unassigned’ (recombinant lineages) constituted 8.73 %  
226 of the diversity.

227

228 To test whether wastewater genomic surveillance can detect changes in lineage abundance  
229 circulating at the community level, we compared dominant Variant of Concern (VOC; variants  
230 associated with high transmissibility or immune evasion) detection rates between clinical and  
231 wastewater sequenced data. We found that the general trend in lineage abundance remained  
232 very comparable to the dynamics between wastewater and clinical data. Furthermore, the  
233 wastewater genomic surveillance consistently recorded mutations associated with ‘other’  
234 lineages in low frequency (<1%), which were otherwise not seen in the clinical samples. There  
235 was a huge mismatch in lineage diversity which was significantly higher in wastewater than  
236 recorded in clinical samples (Mann-Whitney U test,  $p < 0.001$ ; Fig. S4).

237

238 To understand if wastewater sampling can help in the early detection of emerging variants in  
239 the city, we compared the first detection of VOC in wastewater with the collection dates of  
240 clinical samples sequenced as part of genomic surveillance in Bangalore. In contrast, the exact  
241 collection dates for many samples are not mentioned in the database, which prevents a temporal  
242 comparison across several lineages. Nonetheless, we compared the month of the emergence of  
243 VOC in clinical samples from GISAID. For example, BA.2.10.1, BA.2.12 were detected two  
244 months prior in wastewater in January 2022 to the first detection in clinical samples in March  
245 2022 (Fig. 8).

246

247 Until June end, there were 12 genomes of BA.4, and 58 genomes of BA.5 were submitted on  
248 GISAID. The first clinical sample of BA.5 was collected on 11 May 2022 and sequenced in  
249 wastewater sample collected on 18<sup>th</sup> May 2022 from two STPs (Lalbagh and KC Valley2).  
250 BA.5 was detected on two consecutive sampling on 8<sup>th</sup> June and 15<sup>th</sup> June from KC Valley2.  
251 Similarly, BA.4. was first isolated on 24<sup>th</sup> May 2022 in clinical samples and first found in  
252 wastewater on 28<sup>th</sup> May 2022 from Hebbal sewershed site and 30<sup>th</sup> May 2022 from Mailasandra  
253 subsequently sequenced in a sample collected on 16<sup>th</sup> June in Hulimavu. In total, 73 spike  
254 mutations were recorded in BA.4 and BA.5 in the wastewater sample (Fig. S5). The increases  
255 in lineage detection frequency for VOC - ‘unassigned’ (recombinant lineages probably equates  
256 to XM, XE, XN in wastewater) showed an increasing trend whereas BA.2.10 and BA.2  
257 declined with time.

258

259 Our study shows a localized increase in variant diversity and a spike in VOC abundance -BA.1,  
260 BA.1 sub lineages, BA.2 sub lineages, and prevalence of ancient SARS-CoV-2 lineages  
261 recorded in 2020 and Delta lineages across STPs. In addition, the lineage richness was higher  
262 in the ‘red alert’ stage of an emerging wave than during the ‘wave’ phase (see Fig. 2). Both  
263 wastewater and clinical datasets showed low viral richness in March-April. However, there  
264 was a huge surge in lineage diversity in June which corresponded with increasing viral load  
265 both at citywide as well as STPs. This further highlight that the increasing trend was  
266 contributed by a shift from BA.2.10 to many BA.2 sub-lineages rather than one dominating  
267 lineage at the community level. BA.2.10 was the most dominant lineage seen in both  
268 wastewater and clinical samples during the peak of the third wave in January 2022 (Fig. 5).

269

270

271

272

273

274

275



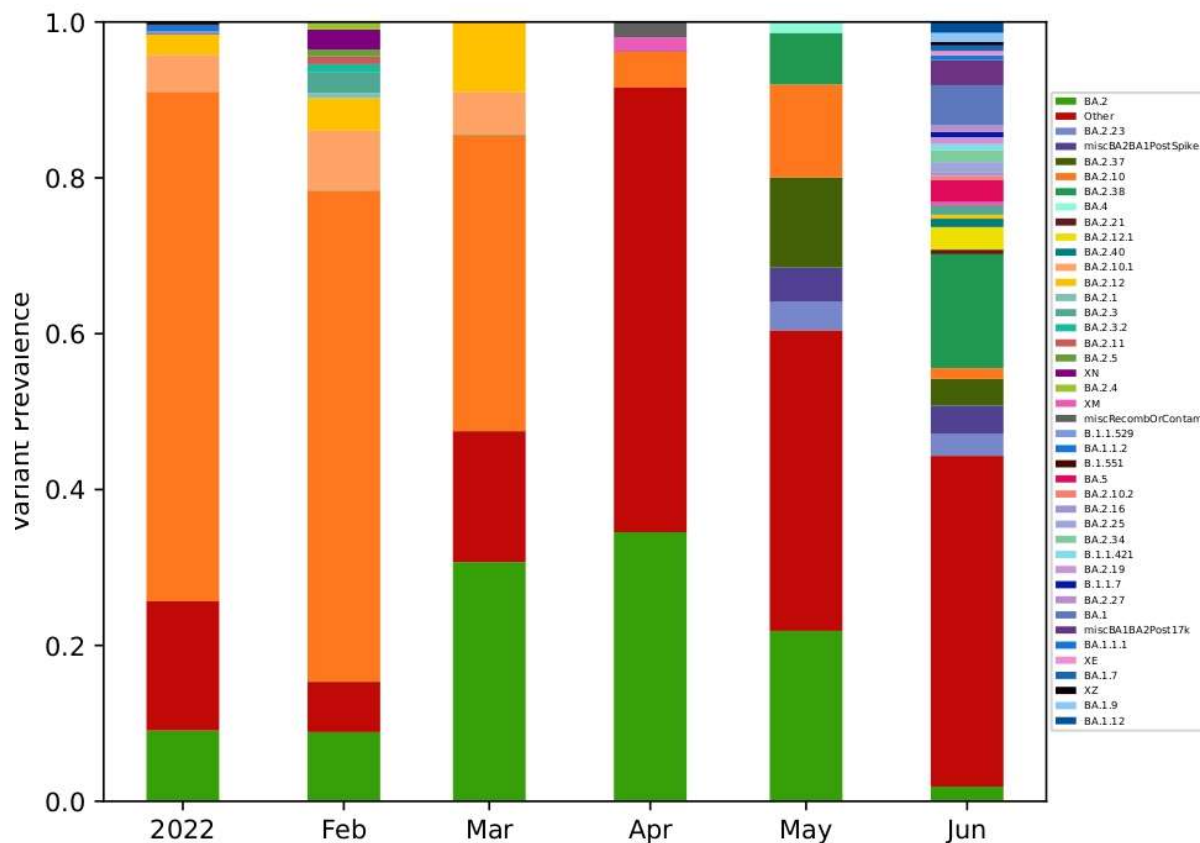

276

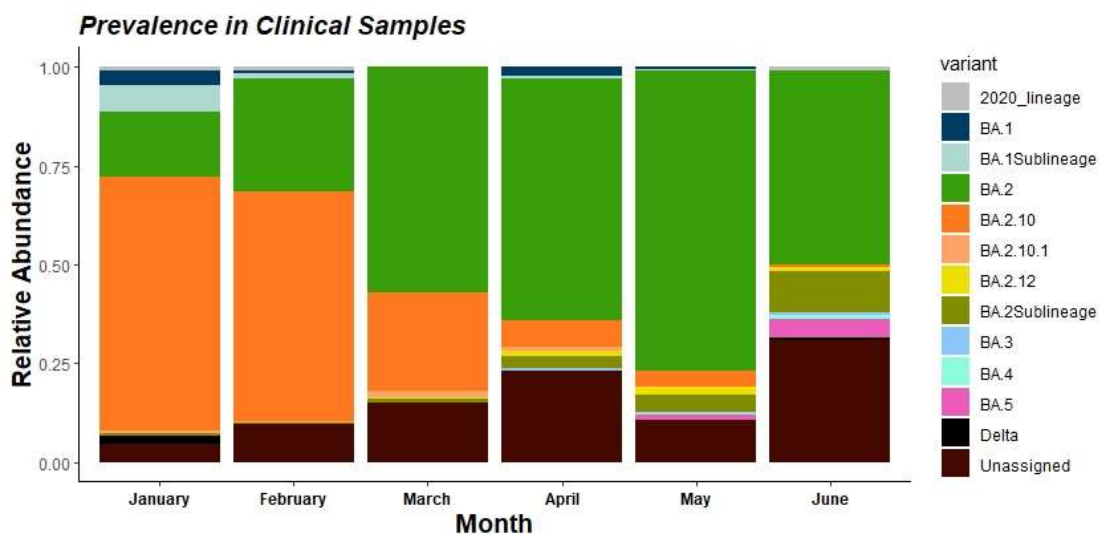

277

278 Fig. 8. Aggregated relative abundance of SARS-CoV-2 variants by month in wastewater in the upper panel  
 279 analysed using *Freyja* and in clinical genomic surveillance in the lower panel. Lineages retrieved in less than  
 280 1% relative abundance are aggregated as 'Other'. **BA.1Sublineages** are aggregate of lineages less than 1% –  
 281 BA.1.1, BA.1.1.1, BA.1.1.16, BA.1.1.7, BA.1.14, BA.1.15, BA.1.15.1, BA.1.17, BA.1.17.2, BA.1.18, BA.1.20.  
 282 **BA.2Sublineages** are aggregate of lineages less than 1% – BA.12.1, BA.2.18, BA.2.20, BA.2.21, BA.2.23,  
 283 BA.2.27, BA.2.3, BA.2.3.1, BA.2.31, BA.2.32, BA.2.38, BA.2.4, BA.2.40.1, BA.2.9. See Fig. S4 for details.  
 284

## 285 Discussion

286 Our longitudinal study provides an in-depth analysis of the SARS-CoV-2 viral concentration  
287 and how this relates to the lineage dynamics in wastewater capturing data from more than 11  
288 million people in Bangalore city. The strong correlation between wastewater viral  
289 concentrations and daily reports of new clinically confirmed COVID-19 cases (Fig. 3) –  
290 combined with the time lag between the wastewater signal and clinical data – suggests that  
291 newly infected individuals contribute significant viral loads to the wastewater. This further  
292 suggests that most of this shedding may occur early in infection (asymptomatic phase),  
293 prior to the individual seeking healthcare and being tested<sup>16</sup>. Therefore, wastewater  
294 surveillance can be used as a complementary tool to clinical testing to predict trends in new  
295 COVID-19 cases. SARS-CoV-2 concentrations in wastewater began to increase exponentially  
296 in late March which led to a mask mandate by the 26<sup>th</sup> April- this period coincided with the  
297 opening of schools and an increase in public movement with a reduced remote working.  
298 Wastewater surveillance revealed the largest number of positive cases likely to be  
299 Mahadevapura zone, East Zone, and Bommanahalli –by [7<sup>th</sup> June](#)-there was renewed mask  
300 mandate- which corresponded with a surge in viral load in four sewersheds. We note that  
301 inadequate testing, changing criteria of testing and population seeking home tests over RTPCR  
302 could introduce uncertainty to the reported cases. Nonetheless, the time-lag used for modelling  
303 fits the data and signifies the timing of infection- that wastewater signals may reflect shedding  
304 dynamics early in infection.

305  
306 Each STP showed a variable viral dynamic which could be primarily driven by individual  
307 shedding rates, viral stability in wastewater, and flow rates of the influent. Our sensitivity  
308 analysis indicated that the estimated number of infected individuals at a citywide level was four  
309 folds higher than reported cases. This information has been crucial in enhancing testing in  
310 targeted locations for the early detection of asymptomatic cases. One of the limitations of our  
311 analysis is the lack of clinical testing data from catchment areas of each sewershed site which  
312 could help correlate with viral load to devise an effective and economical strategy to track the  
313 timing, location, and magnitude of SARS-CoV-2 activity outbreaks. Two sewershed sites-  
314 Kadugodi and V. Valley had technical challenge in obtaining high quality data and sequences  
315 from samples with low viral load and elevated levels of PCR inhibitors.

316  
317 Wastewater data is often fragmented and does not capture all variant-defining mutations on a  
318 single genome. Nonetheless, with an increase in detection of multiple variant-associated

319 mutations or mutations not shared by other known variants, we classify these lineages as  
320 variant-like upon following *Frejya* which used the UShER tree with WHO designation and  
321 *outbreak.info* metadata<sup>37</sup>. Our wastewater samples contained a diversity of SARS-CoV-2  
322 lineages that showed significant difference across months but not by sewershed sites suggesting  
323 that there was no geographical variation in viral composition in the city. Furthermore, we found  
324 low proportion of lineages which were not reported in the clinical data-this discrepancy  
325 highlights that clinical testing and sequencing as per the national guidelines, only symptomatic  
326 individuals are tested. There were lineages only found in clinical samples but not seen in the  
327 wastewater which probably suggests that a very low number of individuals harboured those  
328 variants. This further signifies that dominant VOC infecting a large proportion of individuals  
329 exhibited similar trends in the wastewater. Furthermore, the clinical data is analysed using a  
330 traditional pipeline which assigns a single variant based on the dominant mutations in the  
331 sample. We used a pipeline designed to calculate proportions of VOC from the environmental  
332 samples that is a highly reproducible computational analysis pipeline with comprehensive  
333 reports. Our validation of the pipeline using clinical samples showed mutations associated with  
334 mixed lineages in clinical samples (Fig. S3) which probably highlights that the diversity in  
335 clinical data might be underestimated and the need to consider alternate approaches.

336  
337 Given that we sequenced only 2% of wastewater samples relative to the sequenced clinical  
338 samples, the emergence of variants in wastewater followed a trend that matched with other  
339 countries. For example, the rise of BA.5 is occurring at the same time as the decline in BA.2  
340 in several countries. We detected BA.2.10.1, BA.2.12 two months prior in wastewater in  
341 January 2022 to the first detection in clinical samples in March 2022 in Bangalore whereas  
342 BA.4 and BA.5 were detected in 4-7 days late in wastewater. The emergence of a variant in the  
343 wastewater implies that a significant proportion of individuals in the community are infected  
344 with that variant and shedding the virus. Wastewater testing can provide a less biased snapshot  
345 of viral diversity and community health<sup>17</sup>. Whereas a late detection in the clinical sample could  
346 happen due to limited or biased testing, sequencing<sup>18</sup> or a large proportion of individuals were  
347 asymptomatic or home testing upon COVID-19 symptoms. Clinical samples were sequenced  
348 from a selected hospital which is not representative of the Bangalore population. Karthikeyan  
349 et al.<sup>19</sup> observed varying periods of VOC lineage detection relative to clinical genomic  
350 surveillance, which was attributed to different virus shedding characteristics across lineages<sup>20</sup>.

351

352 While we saw a temporal trend in variants, there was no geographical structure in lineages  
353 across sewerhed sites. Nonetheless, we noticed a similar pattern in viral load and shift from  
354 BA.2.10 to BA.2 sub-lineages-we observed a strong positive association between the local  
355 VOC frequency and estimated number of infected individuals which were consistent with the  
356 increased transmissibility of this VOC identified.

357

358 Our study highlights that quantifying viral titres, correlating with the known number of cases  
359 in the area combined with genomic surveillance helps in tracking of VOCs over time and space  
360 and helps inform policy-making decisions in order to control new outbreaks. Several WBE  
361 initiatives for SARS-CoV-2 monitoring were established worldwide, and currently, the  
362 COVIDpoops19 initiative<sup>1</sup> lists 128 dashboards and our data is displayed as part of the  
363 Bangalore pandemic response initiative. The findings from this study have been discussed  
364 regularly with Bruhat Bangalore Mahanagara Palike (BBMP) and Bangalore Water Supply and  
365 Sewerage Board (BWSSB) to inform policy-making decisions. Our approach can support  
366 establishing WBE for monitoring and early-warning system for detecting pathogens beyond  
367 SARS-CoV-2.

368

## 369 **Conclusion**

370 We developed an early warning system, and its performance was demonstrated by detecting  
371 and tracking the SARS- COV-2 infections and variant diversity in the local community and  
372 city levels from January 2022 to June 2022. The EWMA chart is able to capture the historical  
373 COVID-19 infection patterns and distinguish between endemic situations and the outbreak  
374 patterns. Real-time genomic surveillance is the key to understanding the emerging patterns in  
375 viral load and variants in the city as it helps to develop a pandemic plan as well as be prepared  
376 for future pandemics.

377

378

## 379 **Materials and Methods**

380

### 381 *Wastewater sample collection*

382

383 We sampled influent wastewater from 28 sewage treatment plants (STPs) in Bangalore.  
384 Samples were collected once a week from each STP (January-June 2022) and twice a week  
385 from 14 STPs (April-June 2022). For a constant comparison across the sites, we consider only

386 once a week sampling period in this study. The details of inflow rate, STP capacity (volume of  
387 water), population size is provided in Table 1 and Figure 1.

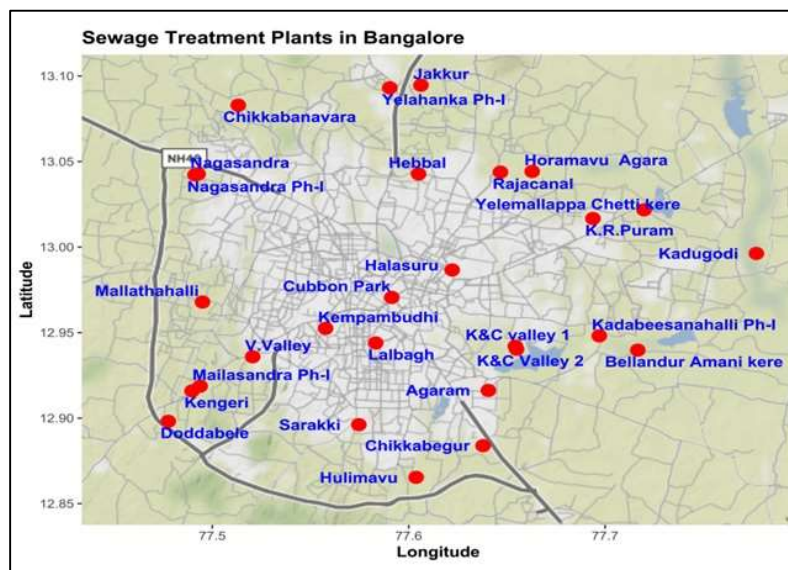

388  
389 Figure 1. Location (red dots) of sewage treatment plants sampled once a week in Bangalore.

390  
391 Samples were collected in 200ml plastic bottles, tightly sealed upon collection, and stored at  
392 4°C in the field. All samples were processed within 24 hrs at a biosafety level 2 facility  
393 following protocol (modified from<sup>11-13, 20-23</sup>) to provide near real-time information on viral  
394 concentrations in sewage. Briefly, samples were subjected to heat inactivation and incubated  
395 in a 200 ml bottle at 60 degrees for 90 minutes and divided into three replicates. Subsequently,  
396 the supernatant from the master samples (200 ml bottle) was transferred to the 50 ml centrifuge  
397 tube containing 0.9 gm NaCl and 4 gm PEG (8000 MW). The PEG and NaCl mixture in the  
398 samples was vortex until it dissolved, and the solution was centrifuged at 11000 rpm for 30  
399 mins. After discarding the supernatant, 600 µl of lysis buffer was added to resuspend the  
400 pellets. Finally, the solution was transferred to a centrifuge tube, briefly vortexed to dissolve  
401 the pellet. Viral RNA was extracted following Qiagen Viral RNA mini kit protocol and 50ul  
402 of elution was stored at -80°C until subsequent analysis.

403  
404 *Viral Reverse Transcriptase-quantitative PCR (RT-qPCR)*

405  
406 Using Genepath Dx CoViDx One v2.1.1TK-Quantitative multiplex RT-qPCR kit, each  
407 sample was screened for the presence of SARS-CoV-2 RNA. The kit targets three viral genes:  
408 N-gene, RdRp-gene, and E-gene along with a human control gene (RNAase P gene). Since the  
409 kit is designed for a qualitative result of positive or negative, for the quantitation of viral load

410 in samples, the [Covid-19 Viral Load Calculation Tool](#) (RUO) was used. A negative extraction  
411 control and extraction control was analyzed with each plate. In order to eliminate the false  
412 negative, RT-qPCR was performed on three extracted replicates of each sample and any  
413 replicate that generated a result defined as ‘positive’ by the test manufacturer was considered  
414 positive. Samples with invalid results were repeated as per the manufacturer’s instructions.

415

#### 416 *Early warning SARS-CoV-2 detection modelling*

417

418 By investigating viral RNA concentrations in the wastewater and correlating it with community  
419 testing data on a weekly basis, we generated an early and real-time map of COVID-19 infection  
420 dynamics in the city. We conducted two main analyses using the raw and normalised viral load.  
421 At the citywide level, we calculated the daily viral load,  $VL$  (copies/d) for SARS-CoV-2, by  
422 normalizing  $C$  (copies/mL) to the average daily STP flow,  $Q(L/d)$  using equation 1<sup>23</sup>) and  $P$  is  
423 the population of inhabitants the catchment of the respective sewershed.

424

$$425 \quad VL = \frac{C \times Q \times 10^3}{P} \quad \text{equation 1}$$

426

427

#### 428 *i) Spatial and temporal dynamics in viral load copies by STPs and at the citywide level*

429

430 To understand spatial and temporal changes in viral load, we used an Exponentially Weighted  
431 Moving Average (EWMA)<sup>23</sup> as the monitoring algorithm to detect moderate and persistent  
432 shifts in cases. The EWMA is calculated as follow:

433

$$434 \quad Z_t = \lambda \bar{X}_t + (1 - \lambda)Z_{t-1}, \quad t = 1, 2, \dots$$

435

436 Where,  $\lambda$  is the smoothing parameter with condition  $0 < \lambda \leq 1$  and  $\bar{X}_t$  is the mean of the  
437 process at time  $t$ .

438

439 We used the control limits of the EWMA chart for detecting a mean shift as follow:

$$440 \quad C = \mu_0$$
$$UCL = \mu_0 + \rho \sqrt{\frac{\lambda}{2 - \lambda}} \sigma$$
$$LCL = \mu_0 - \rho \sqrt{\frac{\lambda}{2 - \lambda}} \sigma$$

441

442 Where,  $C$  is the mean,  $UCL$  is the upper control limit,  $LCL$  is the lower control limit,  $\sigma$  is the  
443 process standard deviation,  $\rho$  is the width of the boundary of the control and EWMA chart  
444 values are computed by using the R package “*qcc*.”<sup>25</sup>

445 The EWMA control chart as the surveillance algorithm triggers an alarm of outbreak once the  
446 monitoring statistic exceeds the control limit, which is computed based on the design of the  
447 control chart. The EWMA gives the maximum weight to the most recent observations and  
448 exponentially gives less weight to all earlier observations. Since no previous wastewater data  
449 was available from the city, we define the threshold as the sum of the mean weekly viral load.  
450 We use the mean line as the threshold, and the ‘early warning’ signal is when the weekly viral  
451 load/incidence exceeds it. If predicted data points are below/above the average line, this  
452 indicates a less/high risk of covid -19 infection. However, if predicted data points are greater  
453 than the projected line (upper control limit), this indicates a ‘red alert’ of infection with  
454 COVID-19.

455  
456 SARS-CoV-2 viral load copies in the wastewater can potentially be affected by the incubation  
457 period of a particular variant, population susceptibility, and differences in degradation rates in  
458 the sewer system. The mean incubation period of the ancestral SARS-CoV-2 variant is 6.4  
459 days<sup>26</sup>, the SARS-CoV-2 Delta variant is 4.8 days<sup>27-28</sup>, and the Omicron variant is 3.6 days<sup>28</sup>.  
460 To compare the SARS-CoV-2 wastewater signal with COVID-19 cases at the citywide level,  
461 we used time lags of 7-days and 4-days to accommodate variable incubation periods of multiple  
462 variants seen in the wastewater (see section on variant analysis). Daily reports detailing the  
463 number of samples tested and positive for COVID-19 were collected from the BBMP COVID-  
464 19 portal (<https://apps.bbmpgov.in/Covid19/en/mediabulletin.php>). The omicron and delta  
465 SARS-CoV-2 variants shed culturable virus more than five days after symptom onset or first  
466 positive test<sup>29</sup>, and virus in feces can remain for more than 20 days, in which case prolonged  
467 shedding may contribute significant signal to wastewater<sup>29-30</sup>. We modelled EWMA with time  
468 lags of 4-days and 7-days. Time-step (4-days and 7-day lag) Pearson’s R correlation analyses  
469 were performed to evaluate the fit between log-transformed SARS-CoV-2 viral copies in  
470 wastewater and reported clinical data. We did not conduct this analysis at the STP level as the  
471 clinical testing data for each sewershed catchment size is unavailable. Using citywide clinical  
472 testing data gives a biased estimate due to varying inflow and catchment size of each  
473 sewershed.

474  
475

476 *ii) Estimation of infected individuals by STP and citywide*

477 We estimated the number of infected individuals by each STP and citywide. The prevalence of  
478 SARS-CoV-2 infection within the catchment of each STP was estimated using the total number  
479 of viral RNA copies in wastewater each day, as measured in wastewater by RT-qPCR, and the  
480 number of SARS-CoV-2 RNA copies shed in stool by an infected following Ahmed et al.<sup>10</sup>  
481 equation 2

$$\text{No. of infected individuals} = \frac{\left(\frac{\text{RNA copies}}{\text{L water}}\right) * \left(\text{L water} \frac{\text{day}}{\text{day}}\right)}{\left(\frac{\text{g faeces}}{\text{day}}\right) * \left(\frac{\text{RNA copies}}{\text{g faeces}}\right)}$$

482 equation 2

483 Briefly, SARS-CoV-2 RNA copies/L of wastewater were modelled as point estimates for each  
484 date of detection. The daily flow rate of wastewater was calculated for each sewershed using  
485 the product of the population of each catchment area and the observed average per capita  
486 wastewater rate of 100L/person/day. The daily stool mass of 128 g was used as per<sup>31</sup> and one  
487 person sheds SARS-CoV-2 RNA 10<sup>7</sup>copies/g of feces as per<sup>32</sup>. Spearman's correlation  
488 coefficient was used to calculate the sensitivity of the estimated number of cases and  
489 normalized viral load of each sewershed.

#### 490 *SARS-CoV-2 genome amplification and sequencing*

492  
493 All samples positive with the RTqPCR kit were sequenced at the Next Generation Genomics  
494 Facility in National Centre for Biological Sciences, Tata Institute for Fundamental Research,  
495 Bangalore. The libraries were prepared using the Illumina COVIDSeq Test kit (Cat no:  
496 20043675, Illumina Inc, USA). Extracted RNA samples were primed by random hexamers for  
497 reverse transcription. The cDNA products were amplified using primers targeting the entire  
498 SARS-CoV-2 genome and human cDNA targets in two different multiplex polymerase chain  
499 reaction (PCR) reactions. The amplified product was later processed for tagmentation, and  
500 adapter ligation using IDT for Illumina Nextera DNA Unique Dual Indexes Sets A–D IDT for  
501 Illumina-PCR Indexes Sets 1–4 (384 Indexes, Cat no: 20043137, Illumina Inc, USA). Further  
502 enrichment and clean-up were performed as per the manufacturer's instructions.

503  
504 Pooled libraries were quantified using a qubit 4.0 fluorometer (Invitrogen, USA), and library  
505 sizes were analysed using TapeStation 4200 (Agilent, USA). The libraries were normalized to  
506 2nM and denatured with 0.1N NaOH. 8.1pM of denatured libraries were loaded onto HiSeq  
507 Rapid SR flow cell v2 followed by dual indexed Hiseq 2500 - 1x50 or custom 1x120 cycle  
508 workflow as per the manufacturer's instructions (Illumina Inc).



509 *Bioinformatics*

510

511 Wastewater samples consist of a mixture of variants circulating in a population in contrast with  
512 clinical samples which might be infected with a single variant. In the first step, the raw reads  
513 were aligned the reference genome of SARS-CoV-2 (MN908947). The processed reads are  
514 aligned with the reference genome by BWA Mem<sup>33</sup> and various coverage statistics are taken  
515 by SAMtools coverage/bedcov<sup>34</sup>. The alignment was used for a single nucleotide variant (SNV)  
516 calling iVar<sup>35</sup>. The iVar tool was used to trim the primers and generate a table for each sample  
517 with mutation frequency data and an adj p-value (Fisher's test) for altered positions of SARS-  
518 CoV-2 from the BAM files. iVar was run with a minimum base quality filter of 15 using the  
519 reference genome of SARS-CoV-2 and the feature file `Sars_cov_2.ASM985889v3.101.gff3`  
520 from NCBI. For predicting the lineage abundances, a deconvolution matrix was generated  
521 using *Freyja* (<https://github.com/andersen-lab/Freyja>)<sup>18</sup> - a dedicated bioinformatic pipeline  
522 for wastewater analysis. From measurements of SNV frequency and sequencing depth at each  
523 position in the genome, *Freyja* returns an estimate of the true lineage abundances in the sample.  
524 We cross-validated the efficiency of the deconvolution tool in reliably inferring the mixed  
525 samples with clinical data. We first applied the pipeline to clinical data from Bhoyar *et al.*<sup>36</sup>  
526 and Bangalore (derived sequences submitted to the GISAID EpiCoV database (hereafter,  
527 GISAID; <https://www.gisaid.org/>). *Freyja* used the UShER tree with WHO designation and  
528 *outbreak.info* metadata<sup>37</sup>.

529

530 *Virus richness and diversity*

531 For community diversity analyses, we used lineage abundances (normalized by the read depth  
532 within-sample relative abundances using *Freyja*) to generate Shannon diversity indices and  
533 Bray-Curtis dissimilarity matrices with *vegan* v2.5-7<sup>38</sup>. We also ran Adonis permutational  
534 multivariate analysis of variance (PERMANOVA) tests on the distance matrices and performed  
535 nonmetric multidimensional scaling on the data and compared the relative abundances of  
536 lineages over time with “lmerTest” v3.1-3 using STP as a random effect<sup>39</sup>.

537

538 **References**

539 1. COVIDPoops19, 2022. Summary of global SARS-CoV-2 wastewater monitoring efforts  
540 by UC Merced researchers  
541 [WWW Document]. Univ. Calif. Merced. URL596

- 542 <https://ucmerced.maps.arcgis.com/apps/dashboards/c778145ea5bb4daeb58d31afee389082>  
543 (accessed 1.7.22).  
544
- 545 2. Naughton, C.C., Roman, F.A., Grace Alvarado, A.F., Tariqi, A.Q., Deeming, M.A., Bibby,  
546 K., Bivins, A., Rose, J.B., Medema, G., Ahmed, W., Katsivelis, P., Allan, V., Sinclair, R.,  
547 Zhang, Y., Kinyua, M.N., Author cnaughton, C., 2021. Show us the Data: Global COVID-19  
548 Wastewater Monitoring Efforts, Equity, and Gaps. medRxiv712  
549 2021.03.14.21253564. <https://doi.org/10.1101/2021.03.14.21253564>  
550
- 551 3. Aguiar-Oliveira et al. (2020). Wastewater-Based Epidemiology (WBE) and Viral  
552 Detection in Polluted Surface Water: A Valuable Tool for COVID-19 Surveillance-A Brief  
553 Review. *Int J Environ Res Public Health*. 10;17:9251.  
554
- 555 4. Caicedo-Ochoa et al. (2020) Effective reproductive number estimation for initial stage of  
556 COVID-19 pandemic in Latin American countries. *Int. J. Infect. Dis.* 95, 316–318.  
557
- 558 5. Crits-Christoph et al. (2021) Genome sequencing of Sewage Detects Regionally Prevalent  
559 SARS-CoV-2 Variants. *Mbio*. Vol. 12, No.1 e02703-2  
560
- 561 6. Edition 4th (2011) Guidelines for drinking-water quality WHO chronicle, 38, pp. 104–108  
562
- 563 7. Deshpande et al. (2003) Environmental surveillance system to track wild poliovirus  
564 transmission. *Appl Environ Microbiol*. 69, 2919–2927.  
565
- 566 8. Hovi et al. (2001). Poliovirus surveillance by examining sewage specimens. Quantitative  
567 recovery of virus after introduction into sewerage at remote upstream location. *Epidemiol.*  
568 *Infect.*127, 101–106.  
569
- 570 9. Asghar et al. (2014) Environmental surveillance for polioviruses in the Global Polio  
571 Eradication Initiative. *J Infect Dis*. 210 (Suppl. 1): S294–303.  
572
- 573 10. Ahmed et al. (2020). First confirmed detection of SARS-CoV-2 in untreated wastewater  
574 in Australia: A proof of concept for the wastewater surveillance of COVID-19 in the  
575 community. *Sci. Total Environ.*, 728: 138764  
576
- 577 11. Medema G, Been F, Heijnen L, et al. (2020) Implementation of environmental surveillance  
578 for SARS-CoV-2 virus to support public health decisions: Opportunities and challenges. *Curr*  
579 *Opin Environ Sci Health*, 17:49–71.  
580
- 581 12. Peccia J, Zulli A, Brackney DE, et al. (2020) Measurement of SARS-CoV-2 RNA in  
582 wastewater tracks community infection dynamics. *Nat Biotechnol*, 38:1164–7.  
583
- 584 13. La Rosa G, Iaconelli M, Mancini P, et al. (2020) First detection of SARS-CoV-2 in  
585 untreated wastewaters in Italy. *Sci Total Environ*, 736:139652.  
586
- 587 14. Rambaut, A. *et al.* A dynamic nomenclature proposal for SARS-CoV-2 lineages to assist  
588 genomic epidemiology. *Nat Microbiol* 5, 1403–1407 (2020).  
589
- 590 15. Turakhia, Y. *et al.* Ultrafast Sample placement on Existing tRees (UShER) enables real-  
591 time phylogenetics for the SARS-CoV-2 pandemic. *Nat. Genet.* 53, 809–816 (2021).

- 592  
593 16. Wu, F., Xiao, A., Zhang, J., et al. SARS-CoV-2 titers in wastewater are higher than  
594 expected from clinically confirmed cases. *mSystems*, 5 (2020), [10.1128/mSystems.00614-20](https://doi.org/10.1128/mSystems.00614-20)  
595 17. Randazzo, W. *et al.* SARS-CoV-2 RNA in wastewater anticipated COVID-19 occurrence  
596 in a low prevalence area. *Water Res.* 181, 115942 (2020).  
597  
598 18. Brito AF, Semenova E, Dudas G, Hassler GW, Kalinich CC, Kraemer MUG, Ho J, Tegally  
599 H, Githinji G, Agoti CN, Matkin LE, Whittaker C; Danish Covid-19 Genome Consortium;  
600 COVID-19 Impact Project; Network for Genomic Surveillance in South Africa (NGS-SA);  
601 GISAID core curation team, Howden BP, Sintchenko V, Zuckerman NS, Mor O, Blankenship  
602 HM, de Oliveira T, Lin RTP, Siqueira MM, Resende PC, Vasconcelos ATR, Spilki FR, Aguiar  
603 RS, Alexiev I, Ivanov IN, Philipova I, Carrington CVF, Sahadeo NSD, Gurry C, Maurer-Stroh  
604 S, Naidoo D, von Eije KJ, Perkins MD, van Kerkhove M, Hill SC, Sabino EC, Pybus OG, Dye  
605 C, Bhatt S, Flaxman S, Suchard MA, Grubaugh ND, Baele G, Faria NR. Global disparities in  
606 SARS-CoV-2 genomic surveillance. *medRxiv [Preprint]*. 2021 Dec 9:2021.08.21.21262393.  
607 doi: 10.1101/2021.08.21.21262393. PMID: 34462754; PMCID: PMC8404891.  
608  
609 19. Karthikeyan *et al.* 2022 Wastewater sequencing reveals early cryptic SARS-CoV-2  
610 variant transmission. *Nature*  
611  
612 20. Singanayagam, A. *et al.* Community transmission and viral load kinetics of the SARS-  
613 CoV-2 delta (B.1.617.2) variant in vaccinated and unvaccinated individuals in the UK: a  
614 prospective, longitudinal, cohort study. *Lancet Infect. Dis.* **22**, 183–195 (2022).  
615  
616 20. Sapula SA, Whittall JJ, Pandopoulos AJ, Gerber C, Venter H (2021) An optimized and  
617 robust PEG precipitation method for detection of SARS-CoV-2 in wastewater. *Sci. Total*  
618 *Environ.*, 785: 147270.  
619  
620 21. Zdenkova K, Bartackova J, Cermakova E, Demnerova K, Dostalkova A, Janda V,  
621 Novakova Z et al. (2021) Monitoring COVID-19 spread in Prague local neighborhoods based  
622 on the presence of SARS-CoV-2 RNA in wastewater collected throughout the sewer network.  
623 *medRxiv* 2021.07.28.21261272  
624  
625 22. Zhang, T., Breitbart, M., W.H. Lee, W.H. et al. RNA viral Community in Human Feces:  
626 prevalence of plant pathogenic viruses *PLoS Biol.*, 4 (2005), Article e3,  
627 [10.1371/journal.pbio.0040003](https://doi.org/10.1371/journal.pbio.0040003)  
628  
629 23. Isaksoon, F. Lundy, L., Hedström, A., Székely, A.J., Mohamed, N. et al. Evaluating the use  
630 of alternative normalization approaches on SARS-CoV-2 concentrations in wastewater:  
631 Experiences from two catchments in Northern Sweden. *Environments* 2022, 9, 39.  
632 <https://doi.org/10.3390/environments9030039>  
633  
634 24. Singh, B. P., Madhusudan, J. V., Tiwari, A. K., Singh, S., & Das, U. D. (2020).  
635 Evaluation of EWMA control charts for monitoring spread of transformed observations of  
636 COVID-19 in India. *Asian Journal of Research in Infectious Diseases*, 5(2), 25-36.  
637  
638 25. Scrucca, L. (2004). qcc: an R package for quality control charting and statistical process  
control. *dim (pistonrings)*, 1(200), 3.

- 639 26. Elias, C., Sekri, A., Leblanc, P., Cucherat, M. & Vanhems, P. The incubation period of  
640 COVID-19: A meta-analysis. *Int. J. Infect. Dis.* 104, 708–710 (2021).  
641
- 642 27. Du, Z. et al. Shorter serial intervals and incubation periods in SARS-CoV-2 variants than  
643 the SARS-CoV-2 ancestral strain. *J. Travel Med.* 5, 1–3 (2022).  
644
- 645 28. Grant, R. et al. Impact of SARS-CoV-2 Delta variant on incubation, transmission settings  
646 and vaccine effectiveness: Results from a nationwide case-control study in France. *Lancet*  
647 *Reg. Heal. - Eur.* 13, 1–12448 (2022)  
648
- 649 29. Boucau et al. (2022) Duration of Shedding of Culturable Virus in SARS-CoV-2 Omicron  
650 (BA.1) Infection. DOI: 10.1056/NEJMc2202092  
651
- 652 30. Wölfel, R, Corman, V.M., Guggemos, W, Seilmaier, M., Zange, S., Müller, et al.  
653 Virological assessment of hospitalized patients with COVID-2019  
654 *Nature*, 1–10 (2020), [10.1038/s41586-020-2196-x](https://doi.org/10.1038/s41586-020-2196-x)  
655
- 656 31. Rose, C., Parker, A., Jefferson, B., Cartmell, E., 2015. The characterization of feces and  
657 urine: a review of the literature to inform advanced treatment technology. *Crit. Rev. Environ.*  
658 *Sci. Technol.* 45 (17), 1827–1879.  
659
- 660 32. Foladori P, Cutrupi F, Segata N, Manara S, Pinto F, Malpei F, Bruni L, La Rosa G.  
661 SARS-CoV-2 from faeces to wastewater treatment: What do we know? A review. *Sci Total*  
662 *Environ.* 2020 Nov 15;743:140444. doi: 10.1016/j.scitotenv.2020.140444.  
663
- 664 33. Li, Heng (2014): Aligning sequence reads, clone sequences and assembly con\*gs with  
665 BWA-MEM. figshare. Poster. <https://doi.org/10.6084/m9.figshare.963153.v1>  
666
- 667 34. Li H, Handsaker B, Wysoker A, Fennell T, Ruan J, Homer N, Marth G, Abecasis G,  
668 Durbin R, and 1000 Genome Project Data Processing Subgroup, The Sequence  
669 alignment/map (SAM) format and SAMtools, *Bioinformatics* (2009) 25(16) 2078-9  
670  
671
- 672 35. Grubaugh, N. D. *et al.* An amplicon-based sequencing framework for accurately  
673 measuring intrahost virus diversity using PrimalSeq and iVar. *Genome Biol.* **20**, 8 (2019)  
674
- 675 36. Bhojar RC, Jain A, Sehgal P, Divakar MK, Sharma D, Imran M, et al. (2021) High  
676 throughput detection and genetic epidemiology of SARS-CoV-2 using COVIDSeq next-  
677 generation sequencing. *PLoS ONE* 16(2): e0247115.  
678
- 679 37. Julia L. Mullen, Ginger Tsueng, Alaa Abdel Latif, Manar Alkuzweny, Marco Cano,  
680 Emily Haag, Jerry Zhou, Mark Zeller, Emory Hufbauer, Nate Matteson, Kristian G.  
681 Andersen, Chunlei Wu, Andrew I. Su, Karthik Gangavarapu, Laura D. Hughes, and the  
682 Center for Viral Systems Biology. *outbreak.info*. [outbreak.info](https://outbreak.info/) <https://outbreak.info/> (2021).  
683  
684
- 685 38. Oksanen J, Blanchet FG, Friendly M, Kindt R, Legendre P, McGlenn D, Minchin PR,  
686 O'Hara RB, Simpson GL, Solymos P, Stevens MHH, Szoecs E, Wagner H. 2017 vegan:  
687 community ecology package. <https://github.com/vegandevs/vegan>.  
688

- 689 39. Kuznetsova, A., Brockhoff, P. B., & Christensen, R. H. B. (2017). lmerTest Package:  
690 Tests in Linear Mixed Effects Models. *Journal of Statistical Software*, 82(13), 1–26.  
691 <https://doi.org/10.18637/jss.v082.i13>  
692

693 **Code availability**

694 Freyja is hosted publicly on github (<https://github.com/andersen-lab/Freyja>) and is available  
695 under a BSD-2-Clause License (doi: 10.5281/zenodo.6585067, version 1.3.7). Freyja is  
696 accessible as a package via bioconda  
697 (<https://bioconda.github.io/recipes/freyja/README.html>)  
698

699 **Data Availability**

700 All raw wastewater sequencing data will be available via the NCBI Sequence Read Archive  
701 under the BioProject ID PRJNXXX. Consensus sequences from clinical surveillance  
702 are all available on GISAID.

703

704 **Acknowledgements**

705 This work has been supported by funding from the Rockefeller Foundation grant to National  
706 Centre for Biological Sciences (TIFR) and the Indian Council of Medical Research grant to  
707 (FI) Tata Institute for Genetics and Society and Tata Trusts. We sincerely thank Bangalore  
708 Water Supply and Sewerage Board for providing access to the sewershed sites and Mr. BC  
709 Gangadhar for support throughout this study. We thank Bruhat Bengaluru Mahanagara  
710 Palike, Dr. Thrilok Chandra, Special Health Commissioner, for their support and for using  
711 the findings of this study for informed decisions. Finally, we thank Pradeep N, Vikas V and  
712 Manoj S for their help with sample collections. Finally, we thank Dr. Giridhar Babu for  
713 constructive feedback and constant support throughout this study.

714

715 **Author Contributions**

716 FI, UR and VS: Designed the study; SL: conducted EWMA modelling, SG, AN, SJ:  
717 processed the samples, conducted RNA extractions and RT-qPCR; DS: library preparation  
718 and sequencing; ND and KP: Conducted bioinformatic analysis. RM, FI secured funding. FI  
719 analyzed the data and wrote the manuscript. All authors approve the manuscript.

720 **Supplementary files**

721 Fig. S1. Quantitative reverse transcription PCR Ct of SARS-CoV-2 RNA in sewage samples as determined by  
 722 three viral genes assays against the percentage of genome covered.  
 723

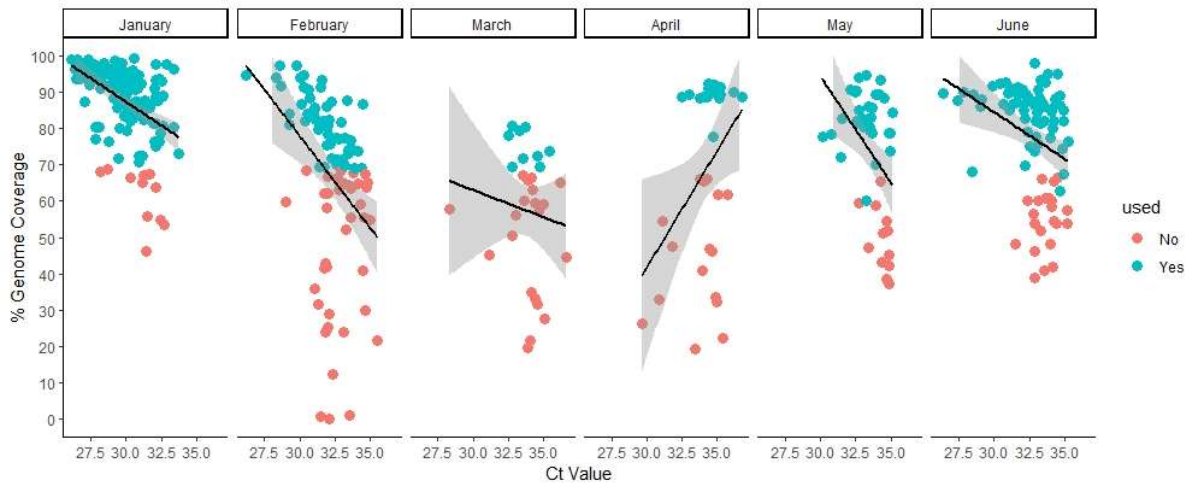

724  
 725  
 726  
 727  
 728

729 Figure S2. Summary of SARS-CoV-2 read abundance through time (a) and negative association between mean  
 730 CT values of three viral genes and viral load copies in wastewater samples from Bangalore city.

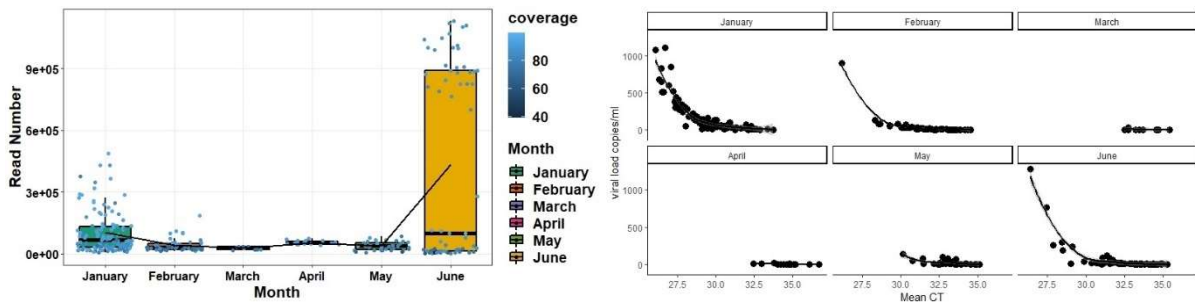

731  
 732  
 733  
 734  
 735  
 736

Total samples: 305 with > 70% genome coverage

January=126; February=52; March=9; April=18; May=34; June=65

737 Figure S3. Sample deconvolution recovers relative virus abundance in clinical samples from Bangalore and  
738 Delhi.

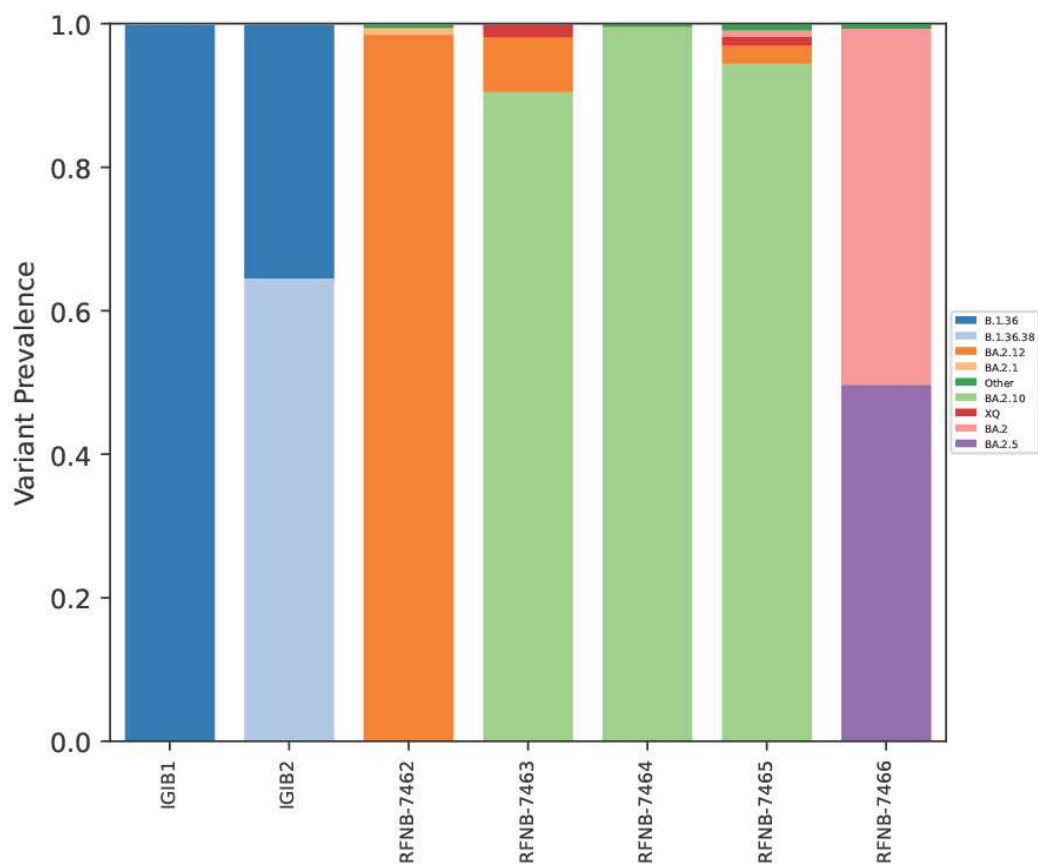

739

| Sample name | GISAID Lineage | <i>Freyja</i> analysis        |
|-------------|----------------|-------------------------------|
| IGIB1       | B.1.36         | B.1.36                        |
| IGIB2       | B.1.36         | B.1.36.38                     |
| RFNB-7462   | BA.2           | BA.2.12, BA.2.1, other        |
| RFNB-7463   | BA.2.10        | BA.2.10, other                |
| RFNB-7464   | BA.2.10        | BA.2.10, BA.2.12, BA.2        |
| RFNB-7465   | BA.2.10        | BA.2.10, BA.2.12, BA.2, Other |
| RFNB-7466   | Unassigned     | BA.2.5, BA.2                  |

740

741

742



743 Fig. S4. Comparison of SARS-CoV-2 lineage richness in Wastewater and Clinical samples.

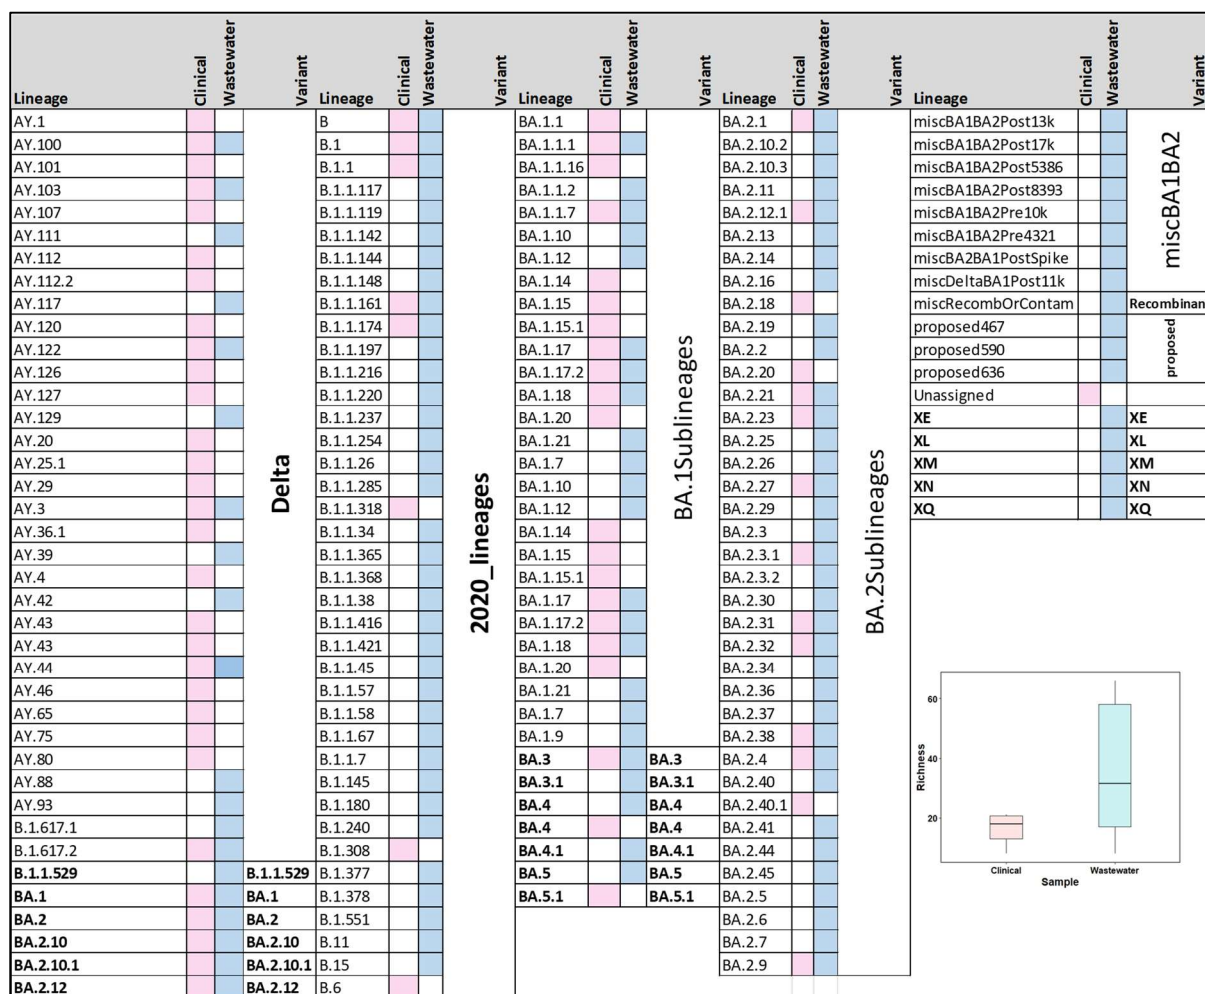

744  
745  
746  
747  
748  
749

750 Fig. S5. Spike gene mutations in BA.4 and BA.5 in wastewater samples

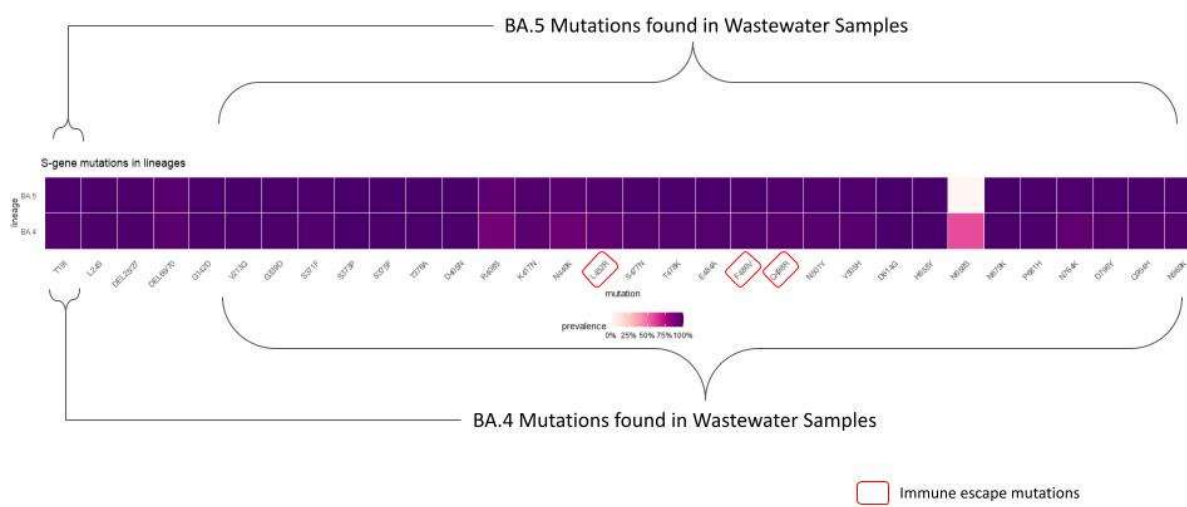

751

752

**Table 1. Lead time of normalized SARS-CoV-2 viral RNA signal weekly SARS-CoV-2 percent positivity**

|                                                                     |                           |                        |                             |                           |                        |                              |                       |
|---------------------------------------------------------------------|---------------------------|------------------------|-----------------------------|---------------------------|------------------------|------------------------------|-----------------------|
| <b>Citywide Positivity of Samples (%)</b>                           |                           |                        |                             |                           |                        |                              | <b>55.77%</b>         |
| <b>Total Size of STP (MLD)</b>                                      |                           |                        |                             |                           |                        |                              | 1142.5                |
| <b>Total Size of STP Inflow (MLD)</b>                               |                           |                        |                             |                           |                        |                              | 926.15                |
| <b>Population size</b>                                              |                           |                        |                             |                           |                        |                              | 11425000              |
| <b>Citywide EWMA using 7-Day Time Lag</b>                           |                           |                        |                             |                           |                        |                              |                       |
|                                                                     | <b>Rate of Change (%)</b> | <b>LCL – Mean Days</b> | <b>LCL – Mean Date</b>      | <b>Rate of Change (%)</b> | <b>Mean – UCL Days</b> | <b>Mean – UCL Date</b>       |                       |
| <b>Raw Viral Load</b>                                               | 20.83%                    | 14                     | June 3-June 17, 2022        | 32.95%                    | 7                      | June 17-June 24, 2022        |                       |
|                                                                     | 34.32%                    | 21                     | May 6-May 27, 2022          |                           |                        |                              |                       |
| <b>Normalized Viral Load</b>                                        | 9.52%                     | 14                     | June 3-June 17, 2022        | 19.40%                    | 7                      | June 17-June 24, 2022        |                       |
|                                                                     | 17.60%                    | 21                     | May 6-May 27, 2022          |                           |                        |                              |                       |
| <b>Estimated Infected Individuals</b>                               | 22.93%                    | 14                     | May 6-May 20, 2022          | 26.81%                    | 7                      | <b>June 17-June 24, 2022</b> |                       |
| <b>Covid Positive Cases</b>                                         | 13.22%                    | 14                     | <b>June 3-June 17, 2022</b> |                           |                        |                              |                       |
| <b>Estimated lead time of wastewater to clinical metric=14 days</b> |                           |                        |                             |                           |                        |                              |                       |
| <b>Citywide EWMA using 4-Day Time Lag</b>                           |                           |                        |                             |                           |                        |                              |                       |
| <b>Raw Viral Load</b>                                               | 50.50%                    | 4                      | May 18-May 22, 2022         | 60.67%                    | 4                      | June 19-June 23, 2022        |                       |
|                                                                     | 49.22%                    | 16                     | May 30-June 15, 2022        |                           |                        |                              |                       |
| <b>Normalized Viral Load</b>                                        | 21.85%                    | 4                      | May 18-May 22, 2022         | 30.54%                    | 4                      | June 19-June 23, 2022        |                       |
|                                                                     | 21.06%                    | 16                     | May 30-June 15, 2022        |                           |                        |                              |                       |
| <b>Estimated Infected Individuals</b>                               | 22%                       | 4                      | May 10-May 14, 2022         | 44.43%                    | 4                      | <b>June 19-June 23, 2022</b> |                       |
|                                                                     | 13.92%                    | 16                     | May 30-June 15, 2022        |                           |                        |                              |                       |
| <b>Covid Positive Cases</b>                                         | 10.21%                    | 8                      | June 3-June 11, 2022        | 7.26%                     | 12                     | <b>June 11-June 23, 2022</b> |                       |
| <b>Estimated lead time of wastewater to clinical metric=8 days</b>  |                           |                        |                             |                           |                        |                              |                       |
| <b>Sewershed Site EWMA</b>                                          |                           |                        |                             |                           |                        |                              |                       |
| <b>Sewershed site (Population)</b>                                  |                           |                        |                             |                           |                        |                              |                       |
| <b>Kempambudhi (10,000)</b>                                         |                           |                        |                             |                           |                        |                              | <b>58% Positivity</b> |
| 1 MLD; 0.97 MLD Inflow                                              | 26.55%                    | 7                      | June 16-June 23, 2022       |                           |                        |                              |                       |

Wastewater infection dynamics and genomic surveillance reveals early SARS-CoV-2 variant transmission in sewersheds in Bangalore, India

|                                            |         |    |                        |         |   |                          |
|--------------------------------------------|---------|----|------------------------|---------|---|--------------------------|
| <b>Lalbagh (15,000)</b>                    |         |    |                        |         |   | <b>61.54% Positivity</b> |
| 1.5 MLD                                    | 48.74%  | 7  | May 31-June 7, 2022    |         |   |                          |
| <b>Halasuru (20,000)</b>                   |         |    |                        |         |   | <b>68% Positivity</b>    |
| 2 MLD; 1.97 MLD Inflow                     | 179.70% | 14 | April 4-April 19, 2022 |         |   |                          |
| <b>Cubbon Park (40,000)</b>                |         |    |                        |         |   | <b>43.48% Positivity</b> |
| 4 MLD; 0.97 MLD Inflow                     | 52.27%  | 14 | May 24-June 7, 2022    |         |   |                          |
| <b>Chikkabanavara (50,000)</b>             |         |    |                        |         |   | <b>60% Positivity</b>    |
| 5 MLD; 4.97 MLD Inflow                     | 110.19% | 21 | May 23- June 13, 2022  |         |   |                          |
| <b>Mallathahalli (50,000)</b>              |         |    |                        |         |   | <b>37.50% Positivity</b> |
| 5 MLD; 3.76 MLD Inflow                     | 42.74%  | 7  | June 20-June 27, 2022  |         |   |                          |
| <b>Chikkabegur (50,000)</b>                |         |    |                        |         |   | <b>60% Positivity</b>    |
| 5 MLD; 3.57 MLD Inflow                     | 99.37%  | 14 | May 26- June 9, 2022   | 53.69%  | 7 | June 16-June 23, 2022    |
| <b>Sarakki (50,000)</b>                    |         |    |                        |         |   | <b>53.58% Positivity</b> |
| 5 MLD; 3.29 MLD                            | 87.35%  | 14 | May 26-June 9, 2022    | 118.81% | 7 | June 16-June 23, 2022    |
| <b>Yelahanka Ph-I (100000)</b>             |         |    |                        |         |   | <b>68.97% Positivity</b> |
| 10 MLD; 10.21 MLD Inflow                   | 38.35%  | 7  | May 31-June 7, 2022    |         |   |                          |
| <b>Hulimavu (100000)</b>                   |         |    |                        |         |   | <b>57.69% Positivity</b> |
| 10 MLD; 7.49 MLD Inflow                    | 82.17%  | 14 | May 19-June 2, 2022    | 49.42%  | 7 | June 16-June 23, 2022    |
| <b>Yele Mallappa Chetti Kere (150,000)</b> |         |    |                        |         |   | <b>65.38% Positivity</b> |
| 15 MLD; 14.66 MLD Inflow                   | 50.09%  | 14 | May 25-June 8, 2022    |         |   |                          |
| <b>Jakkur (150,000)</b>                    |         |    |                        |         |   | <b>43.33% Positivity</b> |
| 15 MLD; 15.34 MLD Inflow                   | 103.75% | 14 | May 27-June 10, 2022   |         |   |                          |
| <b>K R Puram (200,000)♣</b>                |         |    |                        |         |   | <b>68% Positivity</b>    |
| 20 MLD; 16.21 MLD Inflow                   | 32.20%  | 14 | May 25-June 8, 2022    | 33.33%  | 7 | June 15-June 22, 2022    |
| <b>Nagasandra (200,000)</b>                |         |    |                        |         |   | <b>45.83% Positivity</b> |
| 20 MLD; 13.48 MLD Inflow                   | 100.52% | 14 | May 23-June 6, 2022    | 61.65%  | 7 | June 6- June 13, 2022    |
| <b>Nagasandra Ph-I (200,000)</b>           |         |    |                        |         |   | <b>36.36% Positivity</b> |
| 20 MLD; 10.2 MLD Inflow                    | 338.96% | 14 | June 13-June 27, 2022  |         |   |                          |
| <b>Horamavu Agara (200,000)</b>            |         |    |                        |         |   | <b>58.33% Positivity</b> |
| 20 MLD; 18.69 MLD Inflow                   | 267.42% | 7  | May 25-June 1, 2022    | 83.57%  | 7 | June 15-June 22, 2022    |

Wastewater infection dynamics and genomic surveillance reveals early SARS-CoV-2 variant transmission in sewersheds in Bangalore, India

|                                       |         |    |                       |         |   |                          |
|---------------------------------------|---------|----|-----------------------|---------|---|--------------------------|
| <b>Agaram (350000)♣</b>               |         |    |                       |         |   | <b>61.54% Positivity</b> |
| 35 MLD; 33.8 MLD Inflow               | 75.91%  | 21 | May 18-June 8, 2022   | 32.83 % | 7 | June 15-June 22, 2022    |
| <b>Rajacanal (400000)</b>             |         |    |                       |         |   | <b>70% Positivity</b>    |
| 42 MLD; 42.92 MLD Inflow              | 35.53%  | 7  | May 3-May 10, 2022    |         | 4 |                          |
| <b>Doddabelee (400000)</b>            |         |    |                       |         |   | <b>43.48% Positivity</b> |
| 40 MLD; 40.46 MLD Inflow              | 122.06% | 14 | May 16-May 30, 2022   |         |   |                          |
| <b>Kadabeesanahalli Ph-I (500000)</b> |         |    |                       |         |   | <b>56% Positivity</b>    |
| 50 MLD; 42.94 MLD Inflow              | 52.81%  | 14 | June 16-June 30, 2022 |         |   |                          |
| <b>KC Valley 2 (600000)♣</b>          |         |    |                       |         |   | <b>57.69% Positivity</b> |
| 60 MLD; 60.72 MLD Inflow              | 26.86%  | 7  | May 11-May 18, 2022   | 93.71%  | 7 | June 15-June 22, 2022    |
| <b>Kengeri (600000)</b>               |         |    |                       |         |   | <b>58.33% Positivity</b> |
| 60 MLD; 34.29 MLD Inflow              | 50.55%  | 7  | May 30-June 6, 2022   |         |   |                          |
| <b>Mailasandra Ph-I (750000)</b>      |         |    |                       |         |   | <b>57.69% Positivity</b> |
| 75 MLD; 64.9 MLD Inflow               | 58.32%  | 14 | May 23-June 6, 2022   |         |   |                          |
| <b>Hebbal (1000000)</b>               |         |    |                       |         |   | <b>66.67% Positivity</b> |
| 100 MLD; 78.52 MLD Inflow             | 65.69%  |    | April 26-June 7, 2022 |         |   |                          |
| <b>Bellandur Amani Kere (900000)</b>  |         |    |                       |         |   | <b>76% Positivity</b>    |
| 90 MLD; 94.7 MLD Inflow               | 49%     | 14 | April 28-May 12, 2022 | 23.38%  | 7 | May 12-May 19, 2022      |
| <b>K &amp; C Valley 1 (2480000)♣</b>  |         |    |                       |         |   | <b>73.08% Positivity</b> |
| 248 MLD; 219.2 MLD Inflow             | 37.10%  | 7  | May 25-June 1, 2022   | 33.10%  | 7 | June 15- June 22, 2022   |
| <b>V. Valley* (1800000)</b>           |         |    |                       |         |   | <b>31.25% Positivity</b> |
| 180 MLD; 83 MLD Inflow                | 77.56%  | 21 | June 2-June 23, 2022  |         |   |                          |
| <b>Kadugodi* (60000)</b>              |         |    |                       |         |   | <b>27.27% Positivity</b> |
| 6 MLD; 3.57 MLD Inflow                |         |    |                       |         |   |                          |

♣ sewersheds sites showed ‘red alert’ with viral load crossing the upper-class limit (UCL) \* sewersheds sites with PCR inhibitors/poor quality data.
